# Supplementary material for: Comparison of the Microsatellite Distribution Patterns in the Genomes of Euarchontoglires at the Taxonomic Level
Source: Front Genet. 2021 Feb 26;12:622724. doi: 10.3389/fgene.2021.622724 (PMC7953163; doi:10.3389/fgene.2021.622724)
Supplement: Supplementary file 5 [file Table_5.XLSX]

## Sheet: Genome
Table S5A. The most abundant P-SSR repeat motif in Euarchontoglires genomes.
Order	Suborder	Family	Species	The top five most abundant P-SSR motifs (loci/Mb)						The most abundant motif for mono- to hexanucleotide P-SSR
				First	Second	Third	Fourth	Fifth		Mono-	Di-	Tri-	Tetra-	Penta-	Hexa-
Primates	Haplorrhini	Aotidae	Aotus nancymaae	A (202.84)	AC (41.41)	AG (15.98)	AAAT (14.72)	AT (13.87)		A (202.84)	AC (41.41)	AAT (6.65)	AAAT (14.72)	AAAAC (3.71)	AAAAAC (0.7)
Primates	Haplorrhini	Atelidae	Alouatta palliata	A (244.86)	AC (42.88)	AT (21.61)	AAAT (19.31)	AG (16.04)		A (244.86)	AC (42.88)	AAT (6.6)	AAAT (19.31)	AAGGT (9.29)	AAAAAC (0.47)
Primates	Haplorrhini	Atelidae	Ateles geoffroyi	A (214.89)	AC (45.31)	AT (18.56)	AG (15.34)	AAAT (14.67)		A (214.89)	AC (45.31)	AAT (6.29)	AAAT (14.67)	AAAAC (3.74)	AAAAAC (0.51)
Primates	Haplorrhini	Cebidae	Callithrix jacchus	A (197.63)	AC (44.45)	AG (18.27)	AT (16.53)	AAAT (15.23)		A (197.63)	AC (44.45)	AAT (6.11)	AAAT (15.23)	AAAAC (2.93)	AAAAAC (0.35)
Primates	Haplorrhini	Cebidae	Cebus albifrons	A (255.43)	AC (61.87)	AT (21.61)	AG (16.93)	AAAT (15.95)		A (255.43)	AC (61.87)	AAT (6.32)	AAAT (15.95)	AAAAC (4.3)	AAAAAC (0.56)
Primates	Haplorrhini	Cebidae	Cebus capucinus	A (217.92)	AC (46.97)	AT (21.02)	AG (17.39)	AAAT (15.65)		A (217.92)	AC (46.97)	AAT (6.4)	AAAT (15.65)	AAAAC (4.31)	AAAAAC (0.58)
Primates	Haplorrhini	Cebidae	Saguinus imperator	A (187.15)	AC (40.83)	AG (23.82)	AT (18.53)	AAAT (17.43)		A (187.15)	AC (40.83)	AAT (6.55)	AAAT (17.43)	AAAAC (3.06)	AAAAAC (0.45)
Primates	Haplorrhini	Cebidae	Saimiri boliviensis	A (249.58)	AC (49.47)	AG (20.31)	AAAT (16.08)	AT (15.98)		A (249.58)	AC (49.47)	AAC (7.35)	AAAT (16.08)	AAAAC (6.5)	AAAAAC (1.49)
Primates	Haplorrhini	Cebidae	Sapajus apella	A (248.76)	AC (47.87)	AT (19.9)	AG (17.79)	AAAT (16.12)		A (248.76)	AC (47.87)	AAT (6.45)	AAAT (16.12)	AAAAC (4.15)	AAAAAC (0.56)
Primates	Haplorrhini	Cercopithecidae	Cercocebus atys	A (289.65)	AC (47.08)	AAAT (19.73)	AG (18.64)	AAAG (17.33)		A (289.65)	AC (47.08)	AAT (9.55)	AAAT (19.73)	AAAAC (7.12)	AAAAAC (1.28)
Primates	Haplorrhini	Cercopithecidae	Cercopithecus neglectus	A (212.66)	AC (36.72)	AAAT (18.46)	AG (14.94)	AAAC (12.46)		A (212.66)	AC (36.72)	AAT (8.73)	AAAT (18.46)	AAAAC (6.53)	AAAAAC (1.19)
Primates	Haplorrhini	Cercopithecidae	Chlorocebus sabaeus	A (255.69)	AC (43.92)	AAAT (20.85)	AG (18.02)	AAAC (14.49)		A (255.69)	AC (43.92)	AAT (10.11)	AAAT (20.85)	AAAAC (7.74)	AAAAAC (1.44)
Primates	Haplorrhini	Cercopithecidae	Colobus angolensis	A (218.39)	AC (37.97)	AAAT (18.05)	AG (14.52)	AT (12.0)		A (218.39)	AC (37.97)	AAT (8.42)	AAAT (18.05)	AAAAC (5.64)	AAAAAC (0.8)
Primates	Haplorrhini	Cercopithecidae	Erythrocebus patas	A (241.69)	AC (36.48)	AAAT (18.17)	AG (15.83)	AAAG (13.39)		A (241.69)	AC (36.48)	AAT (8.75)	AAAT (18.17)	AAAAC (6.48)	AAAAAC (1.23)
Primates	Haplorrhini	Cercopithecidae	Macaca fascicularis	A (247.27)	AC (42.69)	AAAT (20.2)	AG (17.37)	AAAG (14.0)		A (247.27)	AC (42.69)	AAT (9.59)	AAAT (20.2)	AAAAC (7.12)	AAAAAC (1.24)
Primates	Haplorrhini	Cercopithecidae	Macaca fuscata	A (266.03)	AC (43.71)	AAAT (21.04)	AG (17.31)	AAAC (14.57)		A (266.03)	AC (43.71)	AAT (10.07)	AAAT (21.04)	AAAAC (7.42)	AAAAAC (1.3)
Primates	Haplorrhini	Cercopithecidae	Macaca mulatta	A (263.07)	AC (43.73)	AAAT (20.24)	AG (17.16)	AT (14.25)		A (263.07)	AC (43.73)	AAT (9.68)	AAAT (20.24)	AAAAC (7.07)	AAAAAC (1.18)
Primates	Haplorrhini	Cercopithecidae	Macaca nemestrina	A (253.27)	AC (42.09)	AAAT (18.7)	AG (16.37)	AAAC (13.87)		A (253.27)	AC (42.09)	AAT (8.96)	AAAT (18.7)	AAAAC (7.12)	AAAAAC (1.29)
Primates	Haplorrhini	Cercopithecidae	Mandrillus leucophaeus	A (212.68)	AC (39.78)	AAAT (17.72)	AG (15.36)	AAAC (12.96)		A (212.68)	AC (39.78)	AAT (8.47)	AAAT (17.72)	AAAAC (6.6)	AAAAAC (1.19)
Primates	Haplorrhini	Cercopithecidae	Mandrillus sphinx	A (274.22)	AC (44.95)	AAAT (20.29)	AG (17.52)	AAAC (14.43)		A (274.22)	AC (44.95)	AAT (9.65)	AAAT (20.29)	AAAAC (7.32)	AAAAAC (1.33)
Primates	Haplorrhini	Cercopithecidae	Nasalis larvatus	A (160.77)	AC (31.54)	AAAT (13.63)	AT (10.31)	AG (10.18)		A (160.77)	AC (31.54)	AAT (6.61)	AAAT (13.63)	AAAAC (4.67)	AAAAAC (0.72)
Primates	Haplorrhini	Cercopithecidae	Papio anubis	A (269.25)	AC (43.45)	AAAT (21.26)	AG (17.31)	AAAC (14.8)		A (269.25)	AC (43.45)	AAT (10.18)	AAAT (21.26)	AAAAC (7.48)	AAAAAC (1.19)
Primates	Haplorrhini	Cercopithecidae	Piliocolobus tephrosceles	A (291.8)	AC (39.88)	AT (21.4)	AAAT (21.32)	AG (14.5)		A (291.8)	AC (39.88)	AAT (11.55)	AAAT (21.32)	AAAAC (6.13)	AAAAAC (0.97)
Primates	Haplorrhini	Cercopithecidae	Pygathrix nemaeus	A (296.47)	AC (40.01)	AAAT (20.43)	AG (17.34)	AT (16.51)		A (296.47)	AC (40.01)	AAT (9.31)	AAAT (20.43)	AATGG (8.41)	AAAAAC (0.95)
Primates	Haplorrhini	Cercopithecidae	Rhinopithecus bieti	A (258.71)	AC (42.53)	AAAT (20.66)	AG (17.49)	AT (13.72)		A (258.71)	AC (42.53)	AAT (9.49)	AAAT (20.66)	AAAAC (8.14)	AAGGAG (0.23)
Primates	Haplorrhini	Cercopithecidae	Rhinopithecus roxellana	A (280.33)	AC (41.51)	AAAT (20.75)	AG (17.18)	AT (15.3)		A (280.33)	AC (41.51)	AAT (9.54)	AAAT (20.75)	AAAAC (6.49)	AACCCT (3.35)
Primates	Haplorrhini	Cercopithecidae	Semnopithecus entellus	A (195.37)	AC (31.7)	AAAT (15.25)	AG (12.72)	AT (11.56)		A (195.37)	AC (31.7)	AAT (7.2)	AAAT (15.25)	AAAAC (4.95)	AAAAAC (0.77)
Primates	Haplorrhini	Cercopithecidae	Theropithecus gelada	A (273.69)	AC (42.72)	AAAT (20.77)	AG (17.38)	AAAC (14.45)		A (273.69)	AC (42.72)	AAT (10.03)	AAAT (20.77)	AAAAC (7.38)	AAAAAC (1.31)
Primates	Haplorrhini	Cercopithecidae	Trachypithecus francoisi	A (291.28)	AC (42.69)	AAAT (21.12)	AG (17.52)	AT (15.0)		A (291.28)	AC (42.69)	AAT (9.59)	AAAT (21.12)	AAAAC (6.42)	AAAAAC (1.01)
Primates	Haplorrhini	Hominidae	Gorilla gorilla	A (210.95)	AC (38.3)	AAAT (18.38)	AT (17.53)	AG (13.84)		A (210.95)	AC (38.3)	AAT (8.44)	AAAT (18.38)	AAAAC (5.78)	AAAAAC (0.94)
Primates	Haplorrhini	Hominidae	Homo sapiens	A (219.24)	AC (38.62)	AAAT (18.9)	AT (17.88)	AG (14.64)		A (219.24)	AC (38.62)	AAT (8.74)	AAAT (18.9)	AAAAC (5.81)	AAAAAC (1.0)
Primates	Haplorrhini	Hominidae	Pan paniscus	A (212.97)	AATGG (96.29)	AC (38.26)	AAAT (18.61)	AT (16.75)		A (212.97)	AC (38.26)	AAT (8.56)	AAAT (18.61)	AATGG (96.29)	AAAAAC (0.98)
Primates	Haplorrhini	Hominidae	Pan troglodytes	A (217.45)	AATGG (40.13)	AC (39.12)	AAAT (18.92)	AT (17.03)		A (217.45)	AC (39.12)	AAT (8.71)	AAAT (18.92)	AATGG (40.13)	AAAAAC (1.0)
Primates	Haplorrhini	Hominidae	Pongo abelii	A (217.61)	AATGG (76.1)	AAGGT (74.04)	AC (38.26)	AAAT (19.25)		A (217.61)	AC (38.26)	AAT (12.11)	AAAT (19.25)	AATGG (76.1)	AAAAAC (0.84)
Primates	Haplorrhini	Hylobatidae	Nomascus leucogenys	A (244.61)	AC (40.3)	AAAT (18.86)	AT (18.66)	AATGG (15.55)		A (244.61)	AC (40.3)	AAT (9.03)	AAAT (18.86)	AATGG (15.55)	AAAAAC (0.72)
Primates	Haplorrhini	Hylobatidae	Hylobates moloch	A (250.85)	AC (40.71)	AAAT (19.3)	AT (17.12)	AG (14.52)		A (250.85)	AC (40.71)	AAT (9.25)	AAAT (19.3)	AAAAC (5.74)	AAAAAC (0.81)
Primates	Haplorrhini	Pitheciidae	Pithecia pithecia	A (241.57)	AC (47.54)	AT (23.73)	AG (18.56)	AAAT (14.16)		A (241.57)	AC (47.54)	AAT (6.27)	AAAT (14.16)	AAAAC (4.01)	AAAAAC (0.59)
Primates	Haplorrhini	Pitheciidae	Plecturocebus donacophilus	A (195.14)	AC (42.3)	AT (18.74)	AG (16.66)	AAAT (13.15)		A (195.14)	AC (42.3)	AAT (6.5)	AAAT (13.15)	AAAAC (3.6)	AAAAAC (0.37)
Primates	Haplorrhini	Tarsiidae	Carlito syrichta	A (199.37)	AC (45.13)	AG (23.33)	AAAT (19.67)	AAAG (13.86)		A (199.37)	AC (45.13)	AAT (8.5)	AAAT (19.67)	AATGG (8.77)	AAAAAC (0.56)
Primates	Strepsirrhini	Cheirogaleidae	Cheirogaleus medius	A (105.35)	AC (31.95)	AG (15.65)	AT (12.87)	AAAT (11.39)		A (105.35)	AC (31.95)	AAT (4.18)	AAAT (11.39)	AAAAC (2.4)	AAAAAC (0.21)
Primates	Strepsirrhini	Cheirogaleidae	Microcebus griseorufus	A (181.34)	AC (39.81)	AT (25.47)	AG (18.77)	AAAT (13.82)		A (181.34)	AC (39.81)	AAT (5.36)	AAAT (13.82)	AAAAC (2.95)	AACCCT (1.42)
Primates	Strepsirrhini	Cheirogaleidae	Microcebus mittermeieri	A (175.88)	AC (39.03)	AT (23.92)	AG (17.72)	AAAT (13.35)		A (175.88)	AC (39.03)	AAT (5.34)	AAAT (13.35)	AAAAC (2.98)	AACCCT (4.49)
Primates	Strepsirrhini	Cheirogaleidae	Microcebus murinus	A (167.42)	AC (34.55)	AT (19.33)	AG (15.38)	AAAT (12.11)		A (167.42)	AC (34.55)	AAT (4.86)	AAAT (12.11)	AAAAC (2.7)	AACCCT (0.71)
Primates	Strepsirrhini	Cheirogaleidae	Microcebus ravelobensis	A (181.16)	AC (36.89)	AT (22.37)	AG (15.47)	AAAT (13.88)		A (181.16)	AC (36.89)	AAT (5.4)	AAAT (13.88)	AAAAC (2.98)	AACCCT (2.68)
Primates	Strepsirrhini	Cheirogaleidae	Microcebus tavaratra	A (187.3)	AC (38.64)	AT (25.65)	AG (17.96)	AAAT (13.56)		A (187.3)	AC (38.64)	AAT (4.98)	AAAT (13.56)	AAAAC (2.95)	AACCCT (6.14)
Primates	Strepsirrhini	Cheirogaleidae	Mirza coquereli	A (168.49)	AC (30.5)	AT (18.12)	AG (13.78)	AAAT (11.61)		A (168.49)	AC (30.5)	AAT (4.58)	AAAT (11.61)	AAAAC (2.21)	AACCCT (4.7)
Primates	Strepsirrhini	Cheirogaleidae	Mirza zaza	A (164.85)	AC (34.98)	AT (19.89)	AG (15.32)	AAAT (12.6)		A (164.85)	AC (34.98)	AAT (4.98)	AAAT (12.6)	AAAAC (2.41)	AACCCT (12.11)
Primates	Strepsirrhini	Daubentoniidae	Daubentonia madagascariensis	A (88.83)	AC (31.38)	AG (13.39)	AAAT (8.27)	AT (7.97)		A (88.83)	AC (31.38)	AAT (3.78)	AAAT (8.27)	AAAAC (2.48)	AAAAAC (0.28)
Primates	Strepsirrhini	Galagidae	Otolemur garnettii	A (228.99)	AC (21.63)	AAAT (18.38)	AG (11.56)	AAC (10.62)		A (228.99)	AC (21.63)	AAC (10.62)	AAAT (18.38)	AAAAC (2.56)	AAAAAC (0.34)
Primates	Strepsirrhini	Indriidae	Indri indri	A (171.75)	AC (39.31)	AG (15.66)	AT (12.32)	AAAT (8.95)		A (171.75)	AC (39.31)	AAT (4.24)	AAAT (8.95)	AAAAC (2.28)	AAAAAC (0.28)
Primates	Strepsirrhini	Indriidae	Propithecus coquereli	A (99.03)	AC (26.88)	AG (10.39)	AAAT (5.48)	AT (4.98)		A (99.03)	AC (26.88)	AAT (2.71)	AAAT (5.48)	AAAAC (1.54)	AATCCC (0.19)
Primates	Strepsirrhini	Lemuridae	Eulemur flavifrons	A (187.95)	AC (35.73)	AG (14.9)	AAAT (10.62)	AT (9.44)		A (187.95)	AC (35.73)	AAC (3.15)	AAAT (10.62)	AAAAC (2.81)	AAAAAC (0.33)
Primates	Strepsirrhini	Lemuridae	Eulemur fulvus	A (208.56)	AC (32.66)	AG (13.32)	AATCCC (10.56)	AAAT (10.25)		A (208.56)	AC (32.66)	AAC (3.02)	AAAT (10.25)	AAAAC (2.54)	AATCCC (10.56)
Primates	Strepsirrhini	Lemuridae	Eulemur macaco	A (165.58)	AC (35.16)	AG (14.63)	AAAT (10.22)	AT (9.13)		A (165.58)	AC (35.16)	AAC (3.03)	AAAT (10.22)	AAAAC (2.69)	AACCCT (0.32)
Primates	Strepsirrhini	Lemuridae	Lemur catta	A (152.88)	AC (36.49)	AG (14.64)	AT (12.15)	AAAT (9.39)		A (152.88)	AC (36.49)	AAT (3.78)	AAAT (9.39)	AAAAC (2.37)	AATCCC (2.12)
Primates	Strepsirrhini	Lemuridae	Prolemur simus	A (123.95)	AC (33.91)	AG (12.96)	AT (9.73)	AAAT (9.27)		A (123.95)	AC (33.91)	AAT (3.57)	AAAT (9.27)	AAAAC (2.24)	AATCCC (2.33)
Primates	Strepsirrhini	Lorisidae	Nycticebus coucang	A (302.63)	AAAT (25.36)	AC (22.08)	AT (13.77)	AAC (13.19)		A (302.63)	AC (22.08)	AAC (13.19)	AAAT (25.36)	AAAAT (2.82)	AAAAAC (0.25)
Rodentia	Anomaluromorpha	Pedetidae	Pedetes capensis	A (148.64)	AAC (98.65)	AC (51.61)	AG (28.99)	AT (27.0)		A (148.64)	AC (51.61)	AAC (98.65)	AAAG (19.11)	AAAAC (6.2)	AACCCT (7.0)
Rodentia	Castorimorpha	Castoridae	Castor canadensis	A (125.76)	AC (44.06)	AG (27.13)	AT (14.52)	AAAT (10.05)		A (125.76)	AC (44.06)	AAT (4.37)	AAAT (10.05)	AAAAC (2.3)	AACCCT (0.31)
Rodentia	Castorimorpha	Heteromyidae	Dipodomys stephensi	A (136.81)	AC (121.74)	AG (32.57)	AT (32.03)	AATCCC (31.88)		A (136.81)	AC (121.74)	AAC (12.48)	AAGG (28.54)	AAAAC (2.85)	AATCCC (31.88)
Rodentia	Castorimorpha	Heteromyidae	Dipodomys ordii	A (121.95)	AC (119.44)	AG (32.94)	AT (30.02)	AAG (26.62)		A (121.95)	AC (119.44)	AAG (26.62)	AAGG (26.48)	AAAAC (2.64)	AAGAGG (1.63)
Rodentia	Castorimorpha	Heteromyidae	Perognathus longimembris	A (196.18)	AC (100.34)	AG (35.94)	C (30.13)	AAGG (21.14)		A (196.18)	AC (100.34)	AAC (8.8)	AAGG (21.14)	AAAAC (3.46)	ACAGAG (0.71)
Rodentia	Hystricomorpha	Bathyergidae	Fukomys damarensis	A (144.62)	AC (53.76)	AG (22.84)	AAAC (14.85)	AT (14.11)		A (144.62)	AC (53.76)	AAC (7.47)	AAAC (14.85)	AAAAC (7.49)	AAAAAC (0.85)
Rodentia	Hystricomorpha	Bathyergidae	Heterocephalus glaber	A (110.49)	AC (36.47)	AG (17.78)	AT (12.41)	AAAT (10.58)		A (110.49)	AC (36.47)	AAC (4.25)	AAAT (10.58)	AAAAC (3.94)	AAAAAC (0.4)
Rodentia	Hystricomorpha	Capromydae	Capromys pilorides	A (201.31)	AC (60.64)	AAAT (51.22)	AG (32.66)	AT (27.53)		A (201.31)	AC (60.64)	AAT (11.62)	AAAT (51.22)	AAAAC (3.09)	ACAGAG (1.65)
Rodentia	Hystricomorpha	Caviidae	Cavia aperea	A (78.92)	AC (23.22)	AG (11.83)	AT (6.57)	AAAG (4.88)		A (78.92)	AC (23.22)	AAC (2.22)	AAAG (4.88)	AAAAC (3.0)	ACAGAG (0.54)
Rodentia	Hystricomorpha	Caviidae	Cavia porcellus	A (142.47)	AC (38.74)	AG (23.15)	AT (20.52)	AAAG (9.66)		A (142.47)	AC (38.74)	AAC (3.96)	AAAG (9.66)	AAAAC (5.6)	ACAGAG (1.14)
Rodentia	Hystricomorpha	Caviidae	Cavia tschudii	A (138.81)	AC (37.28)	AACCCT (28.27)	AG (22.39)	AT (19.97)		A (138.81)	AC (37.28)	AAC (3.78)	AAAG (9.39)	AAAAC (5.88)	AACCCT (28.27)
Rodentia	Hystricomorpha	Caviidae	Dolichotis patagonum	A (91.85)	AC (37.1)	AT (20.73)	AG (20.07)	AAAG (13.04)		A (91.85)	AC (37.1)	AAC (4.63)	AAAG (13.04)	AAAAC (7.91)	ATATAG (0.75)
Rodentia	Hystricomorpha	Chinchillidae	Chinchilla lanigera	A (146.31)	AC (40.22)	AG (16.95)	AT (13.36)	AAAT (12.79)		A (146.31)	AC (40.22)	AAT (4.05)	AAAT (12.79)	AAAAC (6.64)	AAAAAC (1.0)
Rodentia	Hystricomorpha	Ctenodactylidae	Ctenodactylus gundi	A (152.33)	AC (65.27)	AG (37.89)	AT (26.13)	C (17.53)		A (152.33)	AC (65.27)	AAC (5.57)	AAAT (15.54)	AAAAC (4.61)	AAAAAC (0.59)
Rodentia	Hystricomorpha	Ctenomyidae	Ctenomys sociabilis	A (262.58)	AC (50.17)	AT (30.31)	AAAT (30.26)	AG (27.89)		A (262.58)	AC (50.17)	AAT (8.48)	AAAT (30.26)	AATGG (4.61)	ACAGAG (0.93)
Rodentia	Hystricomorpha	Cuniculidae	Cuniculus paca	A (113.7)	AC (32.6)	AT (16.74)	AG (14.95)	AAAT (14.59)		A (113.7)	AC (32.6)	AAC (4.04)	AAAT (14.59)	AAAAC (11.86)	AAAAAC (0.95)
Rodentia	Hystricomorpha	Dasyproctidae	Dasyprocta punctata	A (198.65)	AC (38.63)	AG (22.67)	AT (19.34)	AAAT (19.18)		A (198.65)	AC (38.63)	AAC (9.01)	AAAT (19.18)	AAAAC (10.16)	AAAAAC (1.38)
Rodentia	Hystricomorpha	Dinomyidae	Dinomys branickii	A (121.78)	AC (47.58)	AT (16.48)	AG (16.02)	AAAT (9.66)		A (121.78)	AC (47.58)	AAC (9.2)	AAAT (9.66)	AAAAC (2.59)	ACAGAG (0.69)
Rodentia	Hystricomorpha	Erethizontidae	Erethizon dorsatum	A (230.94)	AC (41.82)	AT (20.62)	AAAT (18.13)	AG (17.16)		A (230.94)	AC (41.82)	AAT (5.21)	AAAT (18.13)	AAAAC (8.49)	AAAAAC (1.02)
Rodentia	Hystricomorpha	Hydrochaeridae	Hydrochoerus hydrochaeris	A (111.53)	AC (41.36)	AT (26.2)	AG (22.93)	AAAG (15.03)		A (111.53)	AC (41.36)	AGG (4.46)	AAAG (15.03)	AAAAC (6.38)	AAGAGG (0.57)
Rodentia	Hystricomorpha	Hystricidae	Hystrix cristata	A (165.41)	AC (45.97)	AG (17.28)	AT (10.8)	AAAT (10.22)		A (165.41)	AC (45.97)	AAC (4.47)	AAAT (10.22)	AAAAC (6.31)	AAAAAC (0.78)
Rodentia	Hystricomorpha	Myocastoridae	Myocastor coypus	A (403.99)	AAAT (89.82)	AAG (78.87)	AC (55.13)	AT (40.72)		A (403.99)	AC (55.13)	AAG (78.87)	AAAT (89.82)	AAAAT (17.88)	AAATCC (2.64)
Rodentia	Hystricomorpha	Octodontidae	Octomys mimax	A (214.11)	AC (77.55)	AAAT (55.22)	AG (41.68)	AT (34.17)		A (214.11)	AC (77.55)	AAT (9.29)	AAAT (55.22)	AAAAC (4.14)	ACAGAG (1.78)
Rodentia	Hystricomorpha	Octodontidae	Tympanoctomys barrerae	A (187.74)	AC (69.93)	AAAT (42.56)	AG (38.54)	AT (32.23)		A (187.74)	AC (69.93)	AAT (9.09)	AAAT (42.56)	AAAAC (4.84)	ACAGAG (2.24)
Rodentia	Hystricomorpha	Octodontidae	Octodon degus	A (173.13)	AC (60.38)	AAAT (33.97)	AG (28.56)	AAAG (16.89)		A (173.13)	AC (60.38)	AAT (6.77)	AAAT (33.97)	AAAAC (3.99)	ACAGAG (1.64)
Rodentia	Hystricomorpha	Petromuridae	Petromus typicus	A (224.68)	AC (44.55)	AT (20.53)	AG (18.35)	AAAT (12.12)		A (224.68)	AC (44.55)	AAT (5.18)	AAAT (12.12)	AAAAC (5.68)	AAAAAC (0.71)
Rodentia	Hystricomorpha	Thryonomyidae	Thryonomys swinderianus	A (337.0)	AC (40.96)	AAAG (29.81)	AG (23.59)	AT (20.19)		A (337.0)	AC (40.96)	AAG (6.42)	AAAG (29.81)	AATGG (12.32)	AAGAGG (1.1)
Rodentia	Myomorpha	Cricetidae	Cricetulus griseus	AC (151.59)	A (108.83)	AG (56.71)	AAAC (17.28)	AT (16.91)		A (108.83)	AC (151.59)	AAC (8.15)	AAAC (17.28)	AAAAC (7.65)	ACAGAG (1.73)
Rodentia	Myomorpha	Cricetidae	Ellobius lutescens	AC (100.43)	AG (49.46)	A (38.63)	AAAT (13.92)	AAAC (12.97)		A (38.63)	AC (100.43)	AAT (7.28)	AAAT (13.92)	AAAAC (3.77)	ACAGAG (0.27)
Rodentia	Myomorpha	Cricetidae	Ellobius talpinus	AC (99.14)	AG (50.45)	AT (16.26)	A (15.36)	AAAT (15.16)		A (15.36)	AC (99.14)	AAT (8.56)	AAAT (15.16)	AAAAC (3.28)	ACAGAG (0.39)
Rodentia	Myomorpha	Cricetidae	Mesocricetus auratus	AC (106.43)	A (51.2)	AG (34.36)	AAAC (11.26)	AT (10.81)		A (51.2)	AC (106.43)	AAC (5.12)	AAAC (11.26)	AAAAC (3.42)	ACAGAG (1.5)
Rodentia	Myomorpha	Cricetidae	Microtus agrestis	AC (86.88)	A (62.05)	AG (29.24)	AAAT (15.24)	AT (12.41)		A (62.05)	AC (86.88)	AAT (4.95)	AAAT (15.24)	AAAAC (2.27)	ACAGAG (0.09)
Rodentia	Myomorpha	Cricetidae	Microtus arvalis	A (164.93)	AC (100.08)	AG (51.61)	AAAT (27.31)	AT (22.14)		A (164.93)	AC (100.08)	AAC (6.18)	AAAT (27.31)	AAAAC (3.64)	AAGAGG (0.32)
Rodentia	Myomorpha	Cricetidae	Microtus ochrogaster	A (104.48)	AC (103.45)	AG (41.94)	AAAT (18.49)	AT (13.8)		A (104.48)	AC (103.45)	AAC (6.43)	AAAT (18.49)	AAAAC (3.66)	ACAGAG (0.56)
Rodentia	Myomorpha	Cricetidae	Microtus oeconomus	A (148.57)	AC (105.41)	AG (52.93)	AAAT (23.89)	AT (21.23)		A (148.57)	AC (105.41)	AAC (6.66)	AAAT (23.89)	AAAAC (3.53)	AATCCC (10.77)
Rodentia	Myomorpha	Cricetidae	Myodes glareolus	AC (124.42)	A (70.54)	AG (54.88)	AT (20.19)	AAAT (15.51)		A (70.54)	AC (124.42)	AAC (7.11)	AAAT (15.51)	AAAAC (4.88)	ACAGAG (0.66)
Rodentia	Myomorpha	Cricetidae	Neotoma lepida	AC (101.6)	A (31.59)	AG (27.37)	AT (14.19)	AAAC (13.19)		A (31.59)	AC (101.6)	AAT (6.05)	AAAC (13.19)	AAAAC (4.67)	ACAGAG (0.93)
Rodentia	Myomorpha	Cricetidae	Ondatra zibethicus	AC (100.9)	A (81.94)	AG (42.82)	AAAT (13.35)	AT (12.82)		A (81.94)	AC (100.9)	AAC (5.35)	AAAT (13.35)	AAAAC (3.17)	AAGAGG (0.33)
Rodentia	Myomorpha	Cricetidae	Onychomys torridus	AC (142.62)	A (124.2)	AG (50.78)	AAAC (22.66)	AT (17.84)		A (124.2)	AC (142.62)	AAC (10.18)	AAAC (22.66)	AAAAC (8.06)	AAAAAC (1.7)
Rodentia	Myomorpha	Cricetidae	Peromyscus attwateri	AC (158.19)	A (143.82)	AG (52.01)	AT (22.71)	AAAC (22.54)		A (143.82)	AC (158.19)	AAC (10.27)	AAAC (22.54)	AAAAC (7.72)	AAAAAC (1.32)
Rodentia	Myomorpha	Cricetidae	Peromyscus aztecus	AC (153.16)	A (123.76)	AG (50.46)	AAAC (21.05)	AT (20.46)		A (123.76)	AC (153.16)	AAC (9.42)	AAAC (21.05)	AAAAC (7.09)	AAAAAC (1.03)
Rodentia	Myomorpha	Cricetidae	Peromyscus californicus	AC (153.96)	A (125.19)	AG (48.34)	AT (19.24)	AAAC (16.81)		A (125.19)	AC (153.96)	AAC (7.65)	AAAC (16.81)	AAAAC (5.12)	ACAGAG (1.04)
Rodentia	Myomorpha	Cricetidae	Peromyscus eremicus	AC (144.21)	A (131.27)	AG (45.79)	C (43.74)	AT (20.57)		A (131.27)	AC (144.21)	AAC (9.1)	AAAC (20.13)	AAAAC (7.09)	ACAGAG (1.5)
Rodentia	Myomorpha	Cricetidae	Peromyscus leucopus	A (164.18)	AC (156.54)	AG (52.1)	AT (22.77)	AAAC (20.43)		A (164.18)	AC (156.54)	AAC (9.19)	AAAC (20.43)	AAAAC (5.98)	ACAGAG (1.02)
Rodentia	Myomorpha	Cricetidae	Peromyscus maniculatus	AC (144.21)	A (132.18)	AG (45.99)	AAAC (20.41)	AT (20.03)		A (132.18)	AC (144.21)	AAC (9.39)	AAAC (20.41)	AAAAC (6.24)	ACAGAG (1.21)
Rodentia	Myomorpha	Cricetidae	Peromyscus melanophrys	AC (164.09)	A (128.91)	AG (51.91)	AAAC (21.61)	AT (19.15)		A (128.91)	AC (164.09)	AAC (9.74)	AAAC (21.61)	AAAAC (8.02)	AAAAAC (1.46)
Rodentia	Myomorpha	Cricetidae	Peromyscus nudipes	AC (153.26)	A (115.73)	AG (50.12)	AAAC (20.84)	AT (16.51)		A (115.73)	AC (153.26)	AAC (9.35)	AAAC (20.84)	AAAAC (7.58)	AAAAAC (1.28)
Rodentia	Myomorpha	Cricetidae	Peromyscus polionotus	AC (137.69)	A (115.61)	AG (44.15)	AAAC (18.47)	AT (17.9)		A (115.61)	AC (137.69)	AAC (8.7)	AAAC (18.47)	AAAAC (5.55)	ACAGAG (0.93)
Rodentia	Myomorpha	Cricetidae	Phodopus sungorus	AC (128.2)	A (76.22)	AG (37.14)	AAAC (21.27)	AT (18.4)		A (76.22)	AC (128.2)	AAT (8.65)	AAAC (21.27)	AAAAC (6.89)	AGAGGC (0.88)
Rodentia	Myomorpha	Cricetidae	Sigmodon hispidus	A (133.97)	AC (99.53)	AG (41.26)	AAAT (22.5)	AT (16.99)		A (133.97)	AC (99.53)	AAT (8.74)	AAAT (22.5)	AAAAC (3.62)	AACCCT (11.48)
Rodentia	Myomorpha	Dipodidae	Allactaga bullata	A (280.95)	AG (178.64)	AAAT (88.86)	AC (80.65)	AAAG (31.18)		A (280.95)	AG (178.64)	AAT (13.47)	AAAT (88.86)	AAAAC (8.95)	AAAAAC (0.66)
Rodentia	Myomorpha	Dipodidae	Jaculus jaculus	A (166.55)	AG (115.01)	AC (70.76)	AAAT (50.96)	AT (16.22)		A (166.55)	AG (115.01)	AAC (8.02)	AAAT (50.96)	AAAAC (5.03)	AAAAAC (0.71)
Rodentia	Myomorpha	Dipodidae	Zapus hudsonius	AG (212.14)	A (116.14)	AC (97.17)	AT (49.38)	AAAT (26.21)		A (116.14)	AG (212.14)	AAT (7.24)	AAAT (26.21)	AAAAC (3.14)	ACAGAG (0.65)
Rodentia	Myomorpha	Muridae	Acomys cahirinus	AC (171.79)	A (129.96)	AG (75.55)	AAAC (32.29)	AAC (19.78)		A (129.96)	AC (171.79)	AAC (19.78)	AAAC (32.29)	AAAAC (12.91)	ACAGAG (3.59)
Rodentia	Myomorpha	Muridae	Apodemus speciosus	AC (72.41)	A (53.82)	AG (22.3)	AAAC (12.21)	AT (8.07)		A (53.82)	AC (72.41)	AAC (7.13)	AAAC (12.21)	AAAAC (5.48)	AAAAAC (1.02)
Rodentia	Myomorpha	Muridae	Apodemus sylvaticus	AC (72.67)	A (41.69)	AG (20.88)	AAAC (10.05)	AT (8.79)		A (41.69)	AC (72.67)	AAC (5.84)	AAAC (10.05)	AAAAC (3.56)	AAAAAC (0.45)
Rodentia	Myomorpha	Muridae	Arvicanthis niloticus	A (158.31)	AC (142.81)	AG (66.41)	AT (28.9)	AAAC (24.0)		A (158.31)	AC (142.81)	AGG (11.67)	AAAC (24.0)	AAAAC (7.29)	AGAGGG (1.83)
Rodentia	Myomorpha	Muridae	Grammomys surdaster	AC (143.15)	A (98.96)	AG (69.76)	AT (22.79)	AAAC (22.67)		A (98.96)	AC (143.15)	AGG (11.97)	AAAC (22.67)	AAAAC (6.01)	AGAGGG (2.22)
Rodentia	Myomorpha	Muridae	Mastomys coucha	AC (133.89)	A (121.11)	AG (57.9)	AAAC (26.11)	AT (23.38)		A (121.11)	AC (133.89)	AAC (10.99)	AAAC (26.11)	AAAAC (11.67)	ACAGAG (2.4)
Rodentia	Myomorpha	Muridae	Meriones unguiculatus	A (143.01)	AC (100.0)	AG (33.67)	AAAC (26.5)	AT (18.22)		A (143.01)	AC (100.0)	AAC (9.79)	AAAC (26.5)	AAAAC (9.38)	AAAAAC (0.99)
Rodentia	Myomorpha	Muridae	Mus caroli	AC (134.13)	A (122.32)	AG (59.26)	AAAC (27.91)	AT (27.37)		A (122.32)	AC (134.13)	AAC (11.83)	AAAC (27.91)	AAAAC (11.43)	ACAGAG (1.69)
Rodentia	Myomorpha	Muridae	Mus musculus	AC (144.3)	A (122.79)	AG (65.54)	AAAC (31.76)	AT (25.35)		A (122.79)	AC (144.3)	AAC (13.33)	AAAC (31.76)	AAAAC (13.5)	AAAAAC (1.95)
Rodentia	Myomorpha	Muridae	Mus pahari	AC (150.56)	A (150.28)	AG (62.78)	AT (30.21)	AAAC (26.53)		A (150.28)	AC (150.56)	AAC (13.75)	AAAC (26.53)	AAAAC (11.87)	ACAGAG (2.44)
Rodentia	Myomorpha	Muridae	Mus spicilegus	AC (140.02)	A (113.36)	AG (62.61)	AAAC (30.65)	AT (22.53)		A (113.36)	AC (140.02)	AAC (12.86)	AAAC (30.65)	AAAAC (12.58)	AAAAAC (1.62)
Rodentia	Myomorpha	Muridae	Mus spretus	AC (138.23)	A (114.99)	AG (59.51)	AAAC (29.71)	AAAG (17.21)		A (114.99)	AC (138.23)	AAC (12.28)	AAAC (29.71)	AAAAC (12.04)	ACAGAG (1.84)
Rodentia	Myomorpha	Muridae	Psammomys obesus	A (162.3)	AC (107.49)	AG (32.44)	AAAC (26.86)	AT (19.8)		A (162.3)	AC (107.49)	AAT (10.53)	AAAC (26.86)	AAAAC (9.17)	AAAAAC (0.99)
Rodentia	Myomorpha	Muridae	Rattus norvegicus	AC (157.28)	A (109.47)	AG (60.63)	AT (24.26)	AAAC (15.1)		A (109.47)	AC (157.28)	AGG (9.5)	AAAC (15.1)	AAAAC (5.9)	ACAGAG (2.03)
Rodentia	Myomorpha	Muridae	Rattus rattus	AC (197.81)	A (123.81)	AG (69.47)	AT (22.42)	AAAC (17.4)		A (123.81)	AC (197.81)	AGG (14.8)	AAAC (17.4)	AAAAC (6.36)	ACAGAG (2.37)
Rodentia	Myomorpha	Muridae	Rhombomys opimus	A (137.54)	AC (100.37)	AG (33.02)	AAAC (27.26)	AT (20.12)		A (137.54)	AC (100.37)	AAC (9.98)	AAAC (27.26)	AAAAC (10.23)	AACCCT (2.85)
Rodentia	Myomorpha	Nesomyidae	Cricetomys gambianus	AC (149.15)	A (93.21)	AG (40.42)	AT (26.18)	AAAG (13.39)		A (93.21)	AC (149.15)	AAT (7.31)	AAAG (13.39)	AAAAC (3.87)	AATCCC (10.32)
Rodentia	Myomorpha	Spalacidae	Nannospalax galili	A (106.78)	AC (98.59)	AG (38.36)	AAAT (16.93)	ATAG (13.55)		A (106.78)	AC (98.59)	AAT (5.97)	AAAT (16.93)	AAAAC (4.23)	AATCCC (0.81)
Rodentia	Myomorpha	Spalacidae	Rhizomys pruinosus	A (236.53)	AC (86.36)	AAAT (42.32)	AG (37.66)	AT (35.07)		A (236.53)	AC (86.36)	AAC (14.64)	AAAT (42.32)	AAAAC (6.59)	ACGGAG (1.04)
Rodentia	Sciuromorpha	Aplodontiidae	Aplodontia rufa	A (160.29)	AG (84.64)	AC (46.52)	AT (23.75)	AAAT (13.12)		A (160.29)	AG (84.64)	AAC (5.0)	AAAT (13.12)	AAAAC (3.24)	AAAAAC (0.5)
Rodentia	Sciuromorpha	Gliridae	Glis glis	A (244.45)	AG (226.46)	AC (134.21)	AAAT (56.16)	AT (25.13)		A (244.45)	AG (226.46)	AGG (12.42)	AAAT (56.16)	AAAAT (6.75)	AAAAAT (0.76)
Rodentia	Sciuromorpha	Gliridae	Graphiurus murinus	A (387.39)	AC (151.3)	AAAT (50.57)	AG (44.63)	AT (29.45)		A (387.39)	AC (151.3)	AAT (17.3)	AAAT (50.57)	AAAAC (5.88)	AATCCC (6.68)
Rodentia	Sciuromorpha	Gliridae	Muscardinus avellanarius	A (270.44)	AC (149.43)	AAAT (68.58)	AG (45.23)	AT (38.75)		A (270.44)	AC (149.43)	AAT (20.5)	AAAT (68.58)	AAAAT (8.34)	AGAGGG (0.89)
Rodentia	Sciuromorpha	Sciuridae	Cynomys gunnisoni	A (195.99)	AC (67.35)	AG (47.09)	AT (27.64)	AAAT (23.54)		A (195.99)	AC (67.35)	AAC (8.67)	AAAT (23.54)	AAAAC (3.5)	AACCCT (0.42)
Rodentia	Sciuromorpha	Sciuridae	Ictidomys tridecemlineatus	A (152.03)	AC (60.99)	AG (37.97)	AT (21.82)	AAAT (21.35)		A (152.03)	AC (60.99)	AAC (8.44)	AAAT (21.35)	AAAAC (3.32)	AACCCT (0.41)
Rodentia	Sciuromorpha	Sciuridae	Marmota flaviventris	A (178.54)	AC (60.86)	AG (35.85)	AT (27.13)	AAAT (21.92)		A (178.54)	AC (60.86)	AAT (8.57)	AAAT (21.92)	AGGGG (3.64)	AATCCC (2.19)
Rodentia	Sciuromorpha	Sciuridae	Marmota himalayana	A (152.54)	AC (59.75)	AG (35.39)	AAAT (22.68)	AT (18.38)		A (152.54)	AC (59.75)	AAC (8.24)	AAAT (22.68)	AAAAC (3.16)	AATCCC (1.33)
Rodentia	Sciuromorpha	Sciuridae	Marmota marmota	A (173.28)	AC (61.8)	AG (37.33)	AT (29.63)	AAAT (22.84)		A (173.28)	AC (61.8)	AAC (8.53)	AAAT (22.84)	AAAAC (3.3)	AACCCT (1.06)
Rodentia	Sciuromorpha	Sciuridae	Marmota monax	A (157.94)	AC (61.13)	AG (36.92)	AT (33.93)	AAAT (22.52)		A (157.94)	AC (61.13)	AAC (8.48)	AAAT (22.52)	AAAAC (3.12)	AATCCC (2.15)
Rodentia	Sciuromorpha	Sciuridae	Marmota vancouverensis	A (176.8)	AC (59.55)	AG (34.44)	AT (22.11)	AAAT (21.21)		A (176.8)	AC (59.55)	AAT (8.17)	AAAT (21.21)	AGGGG (3.06)	AATCCC (1.7)
Rodentia	Sciuromorpha	Sciuridae	Sciurus carolinensis	A (170.91)	AC (48.85)	AG (23.42)	AT (21.16)	AAAT (16.82)		A (170.91)	AC (48.85)	AGG (5.86)	AAAT (16.82)	AAAAC (4.0)	AAAAAC (0.65)
Rodentia	Sciuromorpha	Sciuridae	Sciurus vulgaris	A (183.22)	AC (47.07)	AG (22.72)	AT (19.64)	AAAT (15.55)		A (183.22)	AC (47.07)	AGG (8.38)	AAAT (15.55)	AAAAC (3.84)	AAAAAC (0.54)
Rodentia	Sciuromorpha	Sciuridae	Spermophilus dauricus	A (149.87)	AC (63.52)	AG (52.85)	AAAT (23.04)	AT (16.89)		A (149.87)	AC (63.52)	AAC (8.68)	AAAT (23.04)	AAAAC (3.25)	AATCCC (0.37)
Rodentia	Sciuromorpha	Sciuridae	Urocitellus parryii	A (164.83)	AC (60.59)	AG (40.75)	AT (26.03)	AAAT (21.49)		A (164.83)	AC (60.59)	AAC (8.03)	AAAT (21.49)	AAAAC (3.24)	AATCCC (2.29)
Rodentia	Sciuromorpha	Sciuridae	Xerus inauris	A (171.57)	AC (42.66)	AAAT (19.9)	AT (17.26)	AG (16.38)		A (171.57)	AC (42.66)	AAT (6.17)	AAAT (19.9)	AAAAC (4.22)	AATCCC (0.58)
Lagomorpha		Leporidae	Lepus americanus	A (201.78)	AG (174.26)	AAAT (61.95)	AC (41.37)	AT (18.46)		A (201.78)	AG (174.26)	AAC (8.03)	AAAT (61.95)	AAAAC (3.05)	AGAGGG (1.24)
Lagomorpha		Leporidae	Lepus timidus	A (156.15)	AG (130.94)	AAAT (50.61)	AC (37.6)	AT (14.88)		A (156.15)	AG (130.94)	AAC (3.17)	AAAT (50.61)	AAAAC (2.45)	AGAGGG (0.96)
Lagomorpha		Leporidae	Oryctolagus cuniculus	A (198.5)	AG (161.29)	AAAT (61.59)	AC (45.68)	AT (14.5)		A (198.5)	AG (161.29)	AAC (3.87)	AAAT (61.59)	AAAAC (3.13)	AGAGGG (1.34)
Lagomorpha		Ochotonidae	Ochotona princeps	A (100.23)	AC (41.62)	AG (38.49)	AAAT (11.95)	AT (9.6)		A (100.23)	AC (41.62)	AAT (5.92)	AAAT (11.95)	AAAAC (2.34)	AACCCT (0.5)
Scandentia		Tupaiidae	Tupaia belangeri	A (260.79)	AG (99.22)	AC (77.34)	AAAT (36.99)	AT (27.76)		A (260.79)	AG (99.22)	AAT (18.18)	AAAT (36.99)	AAAAC (7.88)	AAAAAC (1.23)
Scandentia		Tupaiidae	Tupaia chinensis	A (263.42)	AG (100.92)	AC (80.41)	AAAT (37.86)	AT (19.89)		A (263.42)	AG (100.92)	AAT (18.55)	AAAT (37.86)	AAAAC (8.38)	AAAAAC (1.37)
Scandentia		Tupaiidae	Tupaia tana	A (259.1)	AG (111.86)	AC (85.76)	AAAT (40.81)	AT (30.04)		A (259.1)	AG (111.86)	AAT (22.55)	AAAT (40.81)	AAAAC (8.07)	AAAAAC (1.41)
Dermoptera		Cynocephalidae	Galeopterus variegatus	A (167.88)	AC (38.89)	AAAT (19.57)	AG (17.71)	AT (13.82)		A (167.88)	AC (38.89)	AAT (7.12)	AAAT (19.57)	AAAAT (2.76)	AAAAAC (0.29)

## Sheet: CDS
Table S5B. The most abundant P-SSR repeat motif in CDS regions of Euarchontoglires genomes.
Order	Suborder	Family	Species	The top five most abundant P-SSR motifs (loci/Mb)						The most abundant motif for mono- to hexanucleotide P-SSR
				First	Second	Third	Fourth	Fifth		Mono-	Di-	Tri-	Tetra-	Penta-	Hexa-
Primates	Haplorrhini	Aotidae	Aotus nancymaae	ACG (14.74)	AGG (11.85)	CCG (11.3)	ACC (3.59)	ACC (3.01)		C (0.12)	AC (0.55)	ACG (14.74)	AAGG (0.12)	AAAAG (0.06)	ACCGGG (0.18)
Primates	Haplorrhini	Cebidae	Saimiri boliviensis	AGG (12.01)	ACG (11.92)	ACC (3.43)	CCG (3.24)	CCG (2.66)		C (0.37)	AG (0.71)	AGG (12.01)	AAAG (0.15)	AAAAG (0.06)	ACCGGG (0.22)
Primates	Haplorrhini	Cebidae	Sapajus apella	CCG (16.08)	ACG (15.81)	AGG (13.19)	ACC (3.37)	ACC (2.85)		C (0.39)	AG (0.63)	CCG (16.08)	ACGG (0.18)	AAAAG (0.03)	CCCCGG (0.21)
Primates	Haplorrhini	Cercopithecidae	Cercocebus atys	ACG (17.34)	CCG (14.52)	AGG (14.46)	ACC (4.03)	ACC (2.93)		C (0.15)	AG (2.93)	ACG (17.34)	AAAG (1.84)	AAAAC (0.12)	CCCCGG (0.3)
Primates	Haplorrhini	Cercopithecidae	Chlorocebus sabaeus	ACG (17.05)	CCG (16.15)	AGG (14.12)	ACC (4.49)	ACC (2.64)		C (0.29)	AC (1.91)	ACG (17.05)	AAAG (0.2)	CCCCG (0.35)	ACGAGG (0.41)
Primates	Haplorrhini	Cercopithecidae	Colobus angolensis	AGG (11.71)	AGC (7.13)	ACG (7.09)	CCG (4.52)	CCG (3.44)		C (0.06)	AG (0.5)	AGG (11.71)	AAAG (0.19)	AAAGG (0.03)	ACCCCG (0.19)
Primates	Haplorrhini	Cercopithecidae	Macaca mulatta	ACG (17.47)	CCG (15.82)	AGG (13.88)	ACC (5.88)	ACC (2.93)		C (0.17)	AG (0.75)	ACG (17.47)	CCCG (0.2)	CCCCG (0.09)	CCCCGG (0.35)
Primates	Haplorrhini	Cercopithecidae	Macaca nemestrina	CCG (13.88)	AGG (13.43)	ACG (8.59)	AGC (8.39)	AGC (4.25)		C (0.12)	AG (0.94)	CCG (13.88)	ACAG (0.32)	AAAAG (0.06)	ACCAGC (0.21)
Primates	Haplorrhini	Cercopithecidae	Mandrillus leucophaeus	AGG (12.38)	AGC (7.23)	ACG (6.86)	ACC (3.79)	ACC (3.32)		C (0.03)	AG (0.81)	AGG (12.38)	AAAC (0.12)	AAAAC (0.03)	ACCAGC (0.19)
Primates	Haplorrhini	Cercopithecidae	Papio anubis	CCG (15.39)	AGG (13.52)	AGC (8.81)	ACG (8.78)	ACG (4.07)		C (0.41)	AC (0.82)	CCG (15.39)	AGGG (0.2)	CCCCG (0.09)	CCCCGG (0.32)
Primates	Haplorrhini	Cercopithecidae	Piliocolobus tephrosceles	CCG (13.52)	AGG (12.52)	ACG (8.54)	AAT (7.84)	AAT (6.73)		C (0.4)	AC (0.48)	CCG (13.52)	CCCG (0.13)	AAAAC (0.03)	AAAGAG (0.22)
Primates	Haplorrhini	Cercopithecidae	Rhinopithecus bieti	ACG (15.73)	AGG (11.84)	CCG (9.27)	ACC (3.74)	ACC (2.84)		C (0.3)	AC (0.57)	ACG (15.73)	AGGG (0.18)	ACGCG (0.09)	AACAGC (0.15)
Primates	Haplorrhini	Cercopithecidae	Rhinopithecus roxellana	CCG (15.93)	AGG (12.65)	AGC (8.91)	ACG (8.18)	ACG (4.18)		C (0.26)	AG (0.56)	CCG (15.93)	ACCG (0.18)	CCCCG (0.12)	CCCCGG (0.26)
Primates	Haplorrhini	Cercopithecidae	Theropithecus gelada	ACG (17.52)	CCG (15.2)	AGG (13.57)	ACC (4.37)	ACC (2.9)		C (0.48)	AG (0.63)	ACG (17.52)	ATAC (0.12)	AAAGG (0.03)	CCCCGG (0.33)
Primates	Haplorrhini	Cercopithecidae	Trachypithecus francoisi	CCG (15.85)	AGG (12.95)	AGC (8.45)	ACG (8.42)	ACG (4.21)		C (0.32)	AG (0.61)	CCG (15.85)	CCCG (0.23)	CCCCG (0.15)	CCCCGG (0.26)
Primates	Haplorrhini	Hominidae	Gorilla gorilla	ACG (17.45)	CCG (15.14)	AGG (13.52)	ACC (4.36)	ACC (2.88)		C (0.48)	AG (0.63)	ACG (17.45)	ATAC (0.12)	AAAGG (0.03)	CCCCGG (0.33)
Primates	Haplorrhini	Hominidae	Homo sapiens	CCG (14.54)	AGG (13.38)	ACG (8.24)	AGC (8.19)	AGC (5.32)		C (0.1)	AG (0.48)	CCG (14.54)	AAAG (0.58)	AAAAC (0.05)	ACCCCC (0.13)
Primates	Haplorrhini	Hominidae	Pan paniscus	CCG (18.0)	AGG (13.4)	ACG (8.9)	AGC (7.82)	AGC (4.35)		C (0.09)	AC (0.63)	CCG (18.0)	AGGG (0.28)	CCCCG (0.23)	ACCCGG (0.23)
Primates	Haplorrhini	Hominidae	Pan troglodytes	CCG (17.01)	AGG (13.19)	ACG (8.91)	AGC (7.61)	AGC (4.25)		C (0.46)	AC (1.03)	CCG (17.01)	AAAC (0.23)	CCCCG (0.14)	CCCCCG (0.2)
Primates	Haplorrhini	Hominidae	Pongo abelii	CCG (16.47)	AGG (11.88)	ACG (9.36)	AGC (8.34)	AGC (3.87)		C (0.24)	AG (0.6)	CCG (16.47)	ATCC (0.15)	CCCCG (0.09)	CCCCGG (0.33)
Primates	Haplorrhini	Hylobatidae	Nomascus leucogenys	CCG (16.87)	AGG (13.68)	AGC (8.83)	ACG (8.12)	ACG (3.63)		C (0.24)	AG (0.5)	CCG (16.87)	CCCG (0.21)	CCCCG (0.12)	ACCGGG (0.18)
Primates	Haplorrhini	Hylobatidae	Hylobates moloch	ACG (17.26)	CCG (14.85)	AGG (12.57)	ACC (3.78)	ACC (3.16)		C (0.41)	AG (0.76)	ACG (17.26)	AGGC (0.15)	CCCCG (0.09)	CCCCGG (0.26)
Primates	Haplorrhini	Tarsiidae	Carlito syrichta	AGG (10.09)	ACG (5.47)	AGC (4.88)	AGC (4.88)	AGC (2.78)		C (0.46)	AG (0.69)	AGG (10.09)	AAAG (0.1)	CCCCG (0.07)	ACCCGG (0.16)
Primates	Strepsirrhini	Cheirogaleidae	Microcebus murinus	ACG (17.48)	CCG (15.71)	AGG (14.86)	ACC (4.02)	ACC (2.78)		C (0.21)	AG (0.53)	ACG (17.48)	ATCC (0.35)	AAAAC (0.03)	AGCCCC (0.21)
Primates	Strepsirrhini	Galagidae	Otolemur garnettii	ACG (14.04)	AGG (9.83)	CCG (6.83)	ACC (4.05)	ACC (2.59)		C (0.22)	AG (0.37)	ACG (14.04)	ATCC (0.47)	AAAAG (0.03)	AGGCCC (0.19)
Primates	Strepsirrhini	Indriidae	Propithecus coquereli	CCG (14.54)	AGG (13.33)	AGC (10.25)	ACG (7.11)	ACG (3.71)		C (0.1)	AG (0.48)	CCG (14.54)	ATCC (0.57)	AAAGG (0.03)	ACCCCG (0.22)
Rodentia	Castorimorpha	Castoridae	Castor canadensis	ACG (15.95)	CCG (13.2)	AGG (9.62)	ACC (3.52)	ACC (2.87)		C (0.06)	AG (0.43)	ACG (15.95)	CCCG (0.25)	CCCCG (0.09)	ACCGGG (0.31)
Rodentia	Castorimorpha	Heteromyidae	Dipodomys ordii	AGG (13.59)	CCG (11.76)	AGC (8.59)	ACG (7.94)	ACG (3.91)		C (0.34)	AG (0.59)	AGG (13.59)	ACGG (0.22)	CCCCG (0.06)	CCCCGG (0.22)
Rodentia	Hystricomorpha	Bathyergidae	Fukomys damarensis	ACG (11.57)	AGG (11.54)	AAG (2.96)	ATC (2.19)	ATC (2.13)		C (0.28)	AC (0.68)	ACG (11.57)	AGGC (0.22)	AGGGC (0.06)	ACCCCG (0.22)
Rodentia	Hystricomorpha	Bathyergidae	Heterocephalus glaber	AGG (12.73)	CCG (11.7)	ACG (7.5)	AGC (6.41)	AGC (3.31)		C (0.73)	AG (0.61)	AGG (12.73)	ACGG (0.24)	CCCCG (0.21)	ACCCCG (0.3)
Rodentia	Hystricomorpha	Caviidae	Cavia porcellus	AGG (9.42)	CCG (7.16)	ACG (6.41)	AGC (6.11)	AGC (3.19)		C (0.39)	AG (0.48)	AGG (9.42)	CCCG (0.18)	CCCCG (0.18)	ACCCCG (0.36)
Rodentia	Hystricomorpha	Chinchillidae	Chinchilla lanigera	AGG (12.91)	CCG (6.91)	ACG (6.61)	AGC (6.31)	AGC (2.82)		C (0.33)	AG (0.36)	AGG (12.91)	ACGG (0.27)	CCCCG (0.12)	AAGAGG (0.21)
Rodentia	Hystricomorpha	Octodontidae	Octodon degus	ACG (13.96)	AGG (12.24)	CCG (9.06)	ACC (3.66)	ACC (2.97)		C (0.12)	AG (0.55)	ACG (13.96)	ACGG (0.18)	AAGAG (0.03)	ACCCCG (0.3)
Rodentia	Myomorpha	Cricetidae	Cricetulus griseus	AGG (9.05)	ACG (6.23)	AGC (5.87)	ACC (2.84)	ACC (2.48)		C (0.86)	AG (0.67)	AGG (9.05)	ACAG (0.4)	AAAAC (0.09)	AGGCCC (0.21)
Rodentia	Myomorpha	Cricetidae	Mesocricetus auratus	ACG (16.55)	AGG (12.73)	CCG (9.71)	ACC (3.44)	ACC (1.88)		C (0.22)	AG (0.38)	ACG (16.55)	AAAC (0.13)	CCCCG (0.1)	ACGGGG (0.13)
Rodentia	Myomorpha	Cricetidae	Microtus ochrogaster	AGC (7.57)	AGG (7.24)	ACG (7.03)	CCG (5.7)	CCG (2.93)		C (0.15)	AC (0.27)	AGC (7.57)	ACAG (0.12)	AAACG (0.03)	AGCTCC (0.15)
Rodentia	Myomorpha	Cricetidae	Neotoma lepida	ACG (15.31)	AGG (9.29)	ATC (6.73)	CCG (5.05)	CCG (4.46)		C (0.19)	AC (0.63)	ACG (15.31)	AAAG (0.33)	AAAAG (0.11)	AAGAGG (0.3)
Rodentia	Myomorpha	Cricetidae	Peromyscus leucopus	CCG (20.24)	AGG (12.17)	ACG (10.31)	AGC (9.85)	AGC (3.5)		C (0.57)	AG (0.37)	CCG (20.24)	CCCG (0.29)	CCCCG (0.09)	AGCCGG (0.14)
Rodentia	Myomorpha	Cricetidae	Peromyscus maniculatus	ACG (20.13)	AGG (12.05)	CCG (11.85)	ACC (3.45)	ACC (2.93)		C (0.52)	AG (0.49)	ACG (20.13)	AAAC (0.17)	ACCCC (0.09)	ACCCCG (0.23)
Rodentia	Myomorpha	Dipodidae	Jaculus jaculus	ACG (17.48)	CCG (16.85)	AGG (12.34)	ACC (3.85)	ACC (2.75)		C (0.44)	AG (0.6)	ACG (17.48)	CCCG (0.28)	CCCCG (0.16)	CCCCGG (0.19)
Rodentia	Myomorpha	Muridae	Arvicanthis niloticus	CCG (9.89)	AGG (8.69)	AGC (7.96)	ACG (7.88)	ACG (3.72)		C (1.56)	AG (0.61)	CCG (9.89)	ACCG (0.14)	CCCGG (0.03)	AGCAGG (0.28)
Rodentia	Myomorpha	Muridae	Grammomys surdaster	AGG (8.15)	CCG (8.03)	ACG (7.94)	AGC (7.59)	AGC (3.21)		C (0.29)	AG (0.41)	AGG (8.15)	AAAG (0.15)	AGGGG (0.06)	ACTCCG (0.24)
Rodentia	Myomorpha	Muridae	Mastomys coucha	ACG (16.66)	CCG (13.09)	AGG (9.85)	ACC (3.54)	ACC (2.73)		C (0.06)	AG (0.51)	ACG (16.66)	ATAG (0.42)	CCCCG (0.06)	ACCGAG (0.24)
Rodentia	Myomorpha	Muridae	Meriones unguiculatus	CCG (21.45)	AGG (10.51)	AGC (9.77)	ACG (9.54)	ACG (3.38)		C (0.38)	AG (0.41)	CCG (21.45)	CCCG (0.26)	CCCCG (0.12)	AGGCCC (0.15)
Rodentia	Myomorpha	Muridae	Mus caroli	ACG (16.01)	AGG (10.22)	CCG (9.46)	ACC (3.64)	ACC (2.94)		C (0.23)	AG (0.73)	ACG (16.01)	ATAG (0.21)	CCCGG (0.06)	AGCCCC (0.18)
Rodentia	Myomorpha	Muridae	Mus musculus	AGG (11.23)	CCG (9.21)	AGC (8.56)	ACG (8.38)	ACG (3.71)		C (0.52)	AC (1.48)	AGG (11.23)	ACAG (0.44)	CCCCG (0.08)	ACCAGC (0.29)
Rodentia	Myomorpha	Muridae	Mus pahari	ACG (16.93)	CCG (11.46)	AGG (11.43)	ACC (3.22)	ACC (2.66)		C (0.42)	AG (0.45)	ACG (16.93)	CCCG (0.15)	AAAAC (0.09)	ACCCCG (0.27)
Rodentia	Myomorpha	Muridae	Rattus norvegicus	ACG (14.89)	AGG (10.1)	CCG (7.61)	ACC (4.46)	ACC (3.29)		C (0.22)	AG (0.8)	ACG (14.89)	AACC (0.25)	AAAAT (0.06)	AAGAGG (0.47)
Rodentia	Myomorpha	Muridae	Rattus rattus	AGG (10.26)	CCG (9.59)	AGC (7.92)	ACG (7.78)	ACG (3.3)		C (0.58)	AG (0.44)	AGG (10.26)	AAAC (0.12)	CCGCG (0.06)	AGCCGG (0.15)
Rodentia	Sciuromorpha	Sciuridae	Ictidomys tridecemlineatus	AGG (9.94)	AGC (8.04)	ACG (7.84)	CCG (7.57)	CCG (3.44)		C (0.33)	AG (0.47)	AGG (9.94)	ATAG (0.62)	CCCCG (0.06)	ACCCGG (0.18)
Rodentia	Sciuromorpha	Sciuridae	Marmota flaviventris	ACG (14.57)	AGG (11.02)	CCG (3.92)	ACC (3.31)	ACC (3.04)		C (0.03)	AG (0.36)	ACG (14.57)	ACCG (0.12)	CCCCG (0.06)	AGCCCC (0.15)
Rodentia	Sciuromorpha	Sciuridae	Urocitellus parryii	AGG (12.32)	CCG (11.63)	AGC (8.7)	ACG (8.22)	ACG (3.29)		C (0.54)	AG (0.42)	AGG (12.32)	ACCG (0.09)	AAAAC (0.06)	AGGCCC (0.18)
Rodentia	Myomorpha	Spalacidae	Nannospalax galili	AGG (12.42)	CCG (12.11)	AGC (8.85)	ACG (8.66)	ACG (3.73)		C (0.37)	AG (0.25)	AGG (12.42)	ACGG (0.09)	CCCCG (0.09)	ACCGAG (0.25)
Lagomorpha	—	Leporidae	Oryctolagus cuniculus	CCG (17.83)	ACG (17.39)	AGG (15.4)	ACC (3.35)	ACC (2.8)		C (0.75)	AG (0.62)	CCG (17.83)	ACGG (0.19)	AGGGC (0.09)	ACCCCG (0.37)
Lagomorpha	—	Ochotonidae	Ochotona princeps	ACG (15.22)	AGG (12.95)	CCG (8.93)	ACC (3.88)	ACC (2.24)		C (0.2)	AG (0.49)	ACG (15.22)	AAAG (0.11)	CCCCG (0.11)	ACCCGG (0.11)
Scandentia	—	Tupaiidae	Tupaia chinensis	ACG (10.11)	AGG (9.96)	AAG (2.96)	ACC (2.42)	ACC (1.77)		C (1.56)	AG (0.54)	ACG (10.11)	ACCC (0.09)	AAAGG (0.06)	ACCCGG (0.24)
Dermoptera	—	Cynocephalidae	Galeopterus variegatus	AGG (10.55)	ACG (7.31)	AGC (7.13)	CCG (5.06)	CCG (3.3)		C (0.3)	AG (0.57)	AGG (10.55)	AAAG (0.15)	ACCGG (0.06)	ACCCCG (0.15)

## Sheet: Exon
Table S5C. The most abundant P-SSR repeat motif in exon regions of Euarchontoglires genomes.
Order	Suborder	Family	Species	The top five most abundant P-SSR motifs (loci/Mb)						The most abundant motif for mono- to hexanucleotide P-SSR
				First	Second	Third	Fourth	Fifth		Mono-	Di-	Tri-	Tetra-	Penta-	Hexa-
Primates	Haplorrhini	Aotidae	Aotus nancymaae	AC (17.92)	CCG (8.25)	AG (6.43)	AT (6.12)	AT (4.16)		C (0.33)	AC (17.92)	CCG (8.25)	AAAT (2.41)	AAAAC (1.32)	AAAAAC (0.21)
Primates	Haplorrhini	Atelidae	Saimiri boliviensis	AC (12.81)	AT (4.52)	AG (4.37)	AGG (3.09)	AGG (2.2)		C (1.03)	AC (12.81)	AGG (3.09)	AAAC (1.78)	AAAAC (1.56)	AAAAAC (0.4)
Primates	Haplorrhini	Atelidae	Sapajus apella	AC (27.46)	CCG (13.5)	AG (8.59)	AT (7.55)	AT (5.37)		C (4.16)	AC (27.46)	CCG (13.5)	AAAT (3.3)	AAAAC (2.09)	AAAAAC (0.2)
Primates	Haplorrhini	Cebidae	Cercocebus atys	AC (26.48)	CCG (11.1)	AG (9.1)	AT (6.14)	AT (5.3)		C (1.1)	AC (26.48)	CCG (11.1)	AAAC (5.3)	AAAAC (3.17)	AAAAAC (0.51)
Primates	Haplorrhini	Cebidae	Chlorocebus sabaeus	AC (31.22)	AG (11.09)	CCG (10.36)	AT (6.11)	AT (5.97)		C (1.76)	AC (31.22)	CCG (10.36)	AAAC (5.97)	AAAAC (3.74)	AAAAAC (0.54)
Primates	Haplorrhini	Cebidae	Colobus angolensis	AC (13.45)	AG (4.8)	AT (4.71)	CCG (3.52)	CCG (2.84)		C (0.78)	AC (13.45)	CCG (3.52)	AAAC (2.35)	AAAAC (1.74)	AAAAAC (0.28)
Primates	Haplorrhini	Cebidae	Macaca mulatta	AC (25.24)	CCG (12.45)	AG (9.43)	AT (6.87)	AT (5.36)		C (1.67)	AC (25.24)	CCG (12.45)	AAAC (5.36)	AAAAC (3.13)	AAAAAC (0.44)
Primates	Haplorrhini	Cebidae	Macaca nemestrina	AC (26.26)	CCG (10.5)	AG (9.87)	AT (6.22)	AT (5.74)		C (0.73)	AC (26.26)	CCG (10.5)	AAAC (5.74)	AAAAC (3.53)	AAAAAC (0.51)
Primates	Haplorrhini	Cebidae	Mandrillus leucophaeus	AC (12.81)	AG (4.5)	AT (3.96)	CCG (3.3)	CCG (2.67)		C (0.59)	AC (12.81)	CCG (3.3)	AAAC (2.54)	AAAAC (1.94)	AAAAAC (0.39)
Primates	Haplorrhini	Cercopithecidae	Papio anubis	AC (38.8)	AG (14.67)	CCG (11.72)	AT (8.4)	AT (7.3)		C (4.31)	AC (38.8)	CCG (11.72)	AAAC (7.3)	AAAAC (4.42)	AAAAAC (0.69)
Primates	Haplorrhini	Cercopithecidae	Piliocolobus tephrosceles	AT (16.99)	AC (15.7)	CCG (11.74)	AG (5.41)	AG (4.8)		C (4.8)	AT (16.99)	CCG (11.74)	AAAT (4.55)	AAAAC (1.93)	AAAAAC (0.32)
Primates	Haplorrhini	Cercopithecidae	Rhinopithecus bieti	AC (16.09)	CCG (6.69)	AG (5.47)	AT (3.93)	AT (3.38)		C (1.25)	AC (16.09)	CCG (6.69)	AAAC (3.14)	AAAAC (2.83)	AGCCCC (0.07)
Primates	Haplorrhini	Cercopithecidae	Rhinopithecus roxellana	AC (16.16)	CCG (13.83)	AG (5.72)	AT (5.5)	AT (4.42)		C (2.74)	AC (16.16)	CCG (13.83)	AAAC (3.16)	AAAAC (2.19)	AAAAAC (0.47)
Primates	Haplorrhini	Cercopithecidae	Theropithecus gelada	AC (13.89)	CCG (13.02)	AG (5.43)	AT (4.98)	AT (3.9)		C (2.48)	AC (13.89)	CCG (13.02)	AAAC (2.73)	AAAAC (1.79)	AAAAAC (0.25)
Primates	Haplorrhini	Cercopithecidae	Trachypithecus francoisi	AC (20.19)	CCG (14.51)	AG (7.48)	AT (6.15)	AT (4.55)		C (2.46)	AC (20.19)	CCG (14.51)	AAAC (3.64)	AAAAC (2.57)	AAAAAC (0.38)
Primates	Haplorrhini	Cercopithecidae	Gorilla gorilla	AC (13.22)	CCG (12.39)	AG (5.17)	AT (4.74)	AT (3.72)		C (2.36)	AC (13.22)	CCG (12.39)	AAAC (2.6)	AAAAC (1.71)	AAAAAC (0.24)
Primates	Haplorrhini	Cercopithecidae	Homo sapiens	AC (34.74)	CCG (13.12)	AG (11.22)	AT (10.03)	AT (8.08)		C (2.26)	AC (34.74)	CCG (13.12)	AAAT (8.08)	AAAAC (4.73)	AAAAAC (0.87)
Primates	Haplorrhini	Cercopithecidae	Pan paniscus	AC (25.94)	CCG (13.2)	AG (9.33)	AT (8.11)	AT (6.87)		C (1.55)	AC (25.94)	CCG (13.2)	AAAT (6.87)	AAAAC (4.21)	AAAAAC (0.59)
Primates	Haplorrhini	Cercopithecidae	Pan troglodytes	AC (29.8)	CCG (13.01)	AG (9.96)	AT (7.87)	AT (5.84)		C (1.99)	AC (29.8)	CCG (13.01)	AAAC (5.84)	AAAAC (3.71)	AAAAAC (0.51)
Primates	Haplorrhini	Cercopithecidae	Pongo abelii	AC (15.87)	CCG (12.88)	AT (5.32)	AG (5.07)	AG (4.18)		C (1.11)	AC (15.87)	CCG (12.88)	AAAT (3.29)	AAAAC (1.82)	AAAAAC (0.35)
Primates	Haplorrhini	Cercopithecidae	Nomascus leucogenys	AC (17.78)	CCG (15.01)	AT (6.29)	AG (5.99)	AG (4.55)		C (1.88)	AC (17.78)	CCG (15.01)	AAAC (2.91)	AAAAC (2.05)	AAAAAC (0.33)
Primates	Haplorrhini	Cercopithecidae	Hylobates moloch	AC (17.58)	CCG (13.41)	AG (6.44)	AT (6.32)	AT (4.23)		C (3.45)	AC (17.58)	CCG (13.41)	AAAC (3.02)	AAAAC (2.18)	AAAAAC (0.24)
Primates	Haplorrhini	Cercopithecidae	Carlito syrichta	AC (7.8)	AT (3.89)	CCG (3.61)	AG (3.21)	AG (2.05)		C (1.33)	AC (7.8)	CCG (3.61)	AAAC (1.12)	AAAAC (0.79)	ACACGC (0.09)
Primates	Strepsirrhini	Cercopithecidae	Microcebus murinus	AC (21.81)	CCG (11.31)	AG (9.41)	AT (6.24)	AT (5.66)		C (2.43)	AC (21.81)	CCG (11.31)	AAAT (3.46)	AAAAC (1.38)	ACACGC (0.08)
Primates	Strepsirrhini	Cercopithecidae	Otolemur garnettii	AC (6.53)	CCG (5.74)	AT (3.22)	AGG (3.03)	AGG (2.43)		C (1.82)	AC (6.53)	CCG (5.74)	AAAC (1.32)	AAAAC (0.57)	AAAAAT (0.07)
Primates	Strepsirrhini	Cercopithecidae	Propithecus coquereli	CCG (9.88)	AC (5.81)	AGG (2.91)	AG (2.26)	AG (2.08)		C (0.67)	AC (5.81)	CCG (9.88)	AAAC (0.83)	AAAAC (0.39)	AGCCGG (0.07)
Rodentia	Castorimorpha	Cercopithecidae	Castor canadensis	AC (12.56)	CCG (8.07)	AG (5.75)	AT (3.37)	AT (2.79)		C (0.92)	AC (12.56)	CCG (8.07)	AAAT (1.95)	AAAAC (1.01)	AGCCGG (0.12)
Rodentia	Castorimorpha	Cercopithecidae	Dipodomys ordii	AC (14.29)	CCG (5.31)	AG (5.24)	AT (5.17)	AT (4.57)		C (4.57)	AC (14.29)	CCG (5.31)	AAAC (1.35)	AAAAC (0.69)	AAAAAG (0.05)
Rodentia	Hystricomorpha	Cercopithecidae	Fukomys damarensis	AC (16.87)	AG (4.96)	AGG (2.79)	AAAC (2.63)	AAAC (2.27)		C (0.4)	AC (16.87)	AGG (2.79)	AAAC (2.63)	AAAAC (1.68)	AAAAAC (0.1)
Rodentia	Hystricomorpha	Hominidae	Heterocephalus glaber	AC (26.12)	AG (8.79)	C (6.49)	AT (6.31)	AT (5.93)		C (6.49)	AC (26.12)	CCG (5.93)	AAAT (4.53)	AAAAC (2.68)	AAAAAC (0.3)
Rodentia	Hystricomorpha	Hominidae	Cavia porcellus	AC (13.47)	AT (4.69)	CCG (4.1)	C (3.99)	C (3.82)		C (3.99)	AC (13.47)	CCG (4.1)	AAAC (1.66)	AAAAC (1.26)	AAAAAC (0.28)
Rodentia	Hystricomorpha	Hominidae	Chinchilla lanigera	AC (16.31)	AG (5.22)	AT (4.66)	CCG (3.81)	CCG (2.92)		C (1.76)	AC (16.31)	CCG (3.81)	AAAC (2.14)	AAAAC (1.89)	AAAAAC (0.11)
Rodentia	Hystricomorpha	Hominidae	Octodon degus	AC (10.85)	CCG (6.01)	AGG (5.62)	AT (4.15)	AT (3.25)		C (2.53)	AC (10.85)	CCG (6.01)	AAAC (1.45)	AAAAC (0.82)	AAAAAC (0.2)
Rodentia	Myomorpha	Hominidae	Cricetulus griseus	AC (34.25)	AG (11.22)	AAAC (6.76)	AT (5.24)	AT (4.53)		C (4.53)	AC (34.25)	AAC (3.53)	AAAC (6.76)	AAAAC (3.18)	AAAAAC (0.54)
Rodentia	Myomorpha	Cheirogaleidae	Mesocricetus auratus	AC (30.65)	AG (7.71)	CCG (5.94)	C (4.7)	C (4.68)		C (4.7)	AC (30.65)	CCG (5.94)	AAAC (4.68)	AAAAC (1.79)	AAAAAC (0.17)
Rodentia	Myomorpha	Hylobatidae	Microtus ochrogaster	AC (17.43)	AG (5.02)	C (4.95)	CCG (4.41)	CCG (4.11)		C (4.95)	AC (17.43)	CCG (4.41)	AAAC (3.44)	AAAAC (1.36)	AAAAAC (0.13)
Rodentia	Myomorpha	Cebidae	Neotoma lepida	AC (1.8)	AT (1.1)	AAAC (0.5)	AG (0.44)	AG (0.41)		C (0.19)	AC (1.8)	ACG (0.41)	AAAC (0.5)	AAAAC (0.38)	AAAAAC (0.03)
Rodentia	Myomorpha	Hylobatidae	Peromyscus leucopus	AC (28.08)	CCG (15.35)	AG (7.81)	C (5.33)	C (4.86)		C (5.33)	AC (28.08)	CCG (15.35)	AAAC (4.86)	AAAAC (2.06)	AAAAAC (0.39)
Rodentia	Myomorpha	Pitheciidae	Peromyscus maniculatus	AC (24.24)	CCG (7.59)	AG (6.62)	C (6.59)	C (4.72)		C (6.59)	AC (24.24)	CCG (7.59)	AAAC (4.36)	AAAAC (2.12)	AAAAAC (0.34)
Rodentia	Myomorpha	Pitheciidae	Jaculus jaculus	CCG (5.22)	AGG (2.79)	AC (2.73)	AT (1.89)	AT (1.45)		C (0.84)	AC (2.73)	CCG (5.22)	CCCG (0.67)	AAAAC (0.38)	AATGAC (0.12)
Rodentia	Myomorpha	Tarsiidae	Arvicanthis niloticus	AC (21.46)	AG (9.13)	CCG (7.91)	C (7.72)	C (5.65)		C (7.72)	AC (21.46)	CCG (7.91)	AAAC (5.65)	AAAAC (2.53)	AAAAAC (0.32)
Rodentia	Myomorpha	Cheirogaleidae	Grammomys surdaster	AC (20.84)	AG (7.57)	CCG (5.28)	AAAC (5.04)	AAAC (4.81)		C (3.58)	AC (20.84)	CCG (5.28)	AAAC (5.04)	AAAAC (1.65)	AAAAAC (0.21)
Rodentia	Myomorpha	Cheirogaleidae	Mastomys coucha	AC (38.92)	AG (13.65)	CCG (11.78)	AAAC (7.71)	AAAC (6.76)		C (4.7)	AC (38.92)	CCG (11.78)	AAAC (7.71)	AAAAC (5.34)	AAAAAC (0.92)
Rodentia	Myomorpha	Cheirogaleidae	Meriones unguiculatus	AC (14.5)	CCG (10.79)	AG (5.7)	AAAC (4.83)	AAAC (3.79)		C (3.31)	AC (14.5)	CCG (10.79)	AAAC (4.83)	AAAAC (2.63)	AAAAAC (0.15)
Rodentia	Myomorpha	Cheirogaleidae	Mus caroli	AC (29.33)	AG (11.05)	CCG (9.7)	AAAC (7.97)	AAAC (6.3)		C (6.3)	AC (29.33)	CCG (9.7)	AAAC (7.97)	AAAAC (4.06)	AAAAAC (0.56)
Rodentia	Myomorpha	Cheirogaleidae	Mus musculus	AC (110.69)	AG (43.35)	AAAC (24.82)	C (22.13)	C (11.78)		C (22.13)	AC (110.69)	AAC (11.78)	AAAC (24.82)	AAAAC (10.94)	AAAAAC (1.45)
Rodentia	Myomorpha	Cheirogaleidae	Mus pahari	AC (26.69)	CCG (10.16)	AG (8.94)	C (7.46)	C (5.76)		C (7.46)	AC (26.69)	CCG (10.16)	AAAC (5.76)	AAAAC (3.92)	AAAAAC (0.65)
Rodentia	Myomorpha	Cheirogaleidae	Rattus norvegicus	AC (54.44)	AG (16.58)	AAAC (10.63)	C (7.97)	C (6.54)		C (7.97)	AC (54.44)	AAC (5.65)	AAAC (10.63)	AAAAC (5.42)	AAAAAC (0.76)
Rodentia	Myomorpha	Daubentoniidae	Rattus rattus	AC (17.45)	AG (6.81)	CCG (6.01)	AT (4.01)	AT (3.92)		C (1.08)	AC (17.45)	CCG (6.01)	AAAC (3.92)	AAAAC (2.38)	AAAAAC (0.36)
Rodentia	Myomorpha	Cheirogaleidae	Nannospalax galili	AC (17.41)	AG (6.69)	CCG (4.69)	AT (3.72)	AT (3.33)		C (2.83)	AC (17.41)	CCG (4.69)	AAAC (1.91)	AAAAC (1.48)	AAAAAC (0.11)
Rodentia	Sciuromorpha	Galagidae	Ictidomys tridecemlineatus	AC (14.58)	AT (4.99)	AG (4.55)	CCG (2.94)	CCG (2.77)		C (1.43)	AC (14.58)	CCG (2.94)	AAAC (2.72)	AAAAC (1.98)	AAAAAC (0.13)
Rodentia	Sciuromorpha	Indriidae	Marmota flaviventris	AC (12.23)	CCG (8.57)	C (6.21)	AT (4.72)	AT (4.03)		C (6.21)	AC (12.23)	CCG (8.57)	AAAC (1.93)	AAAAC (0.92)	AAAAAC (0.18)
Rodentia	Sciuromorpha	Indriidae	Urocitellus parryii	AC (38.74)	AG (21.04)	AAAT (16.24)	AT (15.71)	AT (7.06)		C (7.06)	AC (38.74)	AAC (5.34)	AAAT (16.24)	AAAAC (2.1)	ACCCCG (0.19)
Lagomorpha	—	Leporidae	Oryctolagus cuniculus	AC (1176.54)	AG (768.37)	AAAT (467.1)	AT (438.29)	AT (171.36)		C (150.0)	AC (1176.54)	AAC (152.86)	AAAT (467.1)	AAAAC (66.93)	AAAAAC (6.89)
Lagomorpha	—	Ochotonidae	Ochotona princeps	AC (21.14)	C (10.26)	CCG (9.79)	AG (9.53)	AG (4.87)		C (10.26)	AC (21.14)	CCG (9.79)	AAAT (3.05)	AAAAC (1.43)	ACCCCC (0.24)
Scandentia	—	Tupaiidae	Tupaia chinensis	AC (7.44)	AT (4.0)	AG (2.35)	CCG (2.33)	CCG (1.75)		C (1.54)	AC (7.44)	CCG (2.33)	AAAT (1.27)	AAAAC (0.83)	AAAAAC (0.08)
Dermoptera	—	Cynocephalidae	Galeopterus variegatus	AC (2.72)	CCG (2.38)	AGG (1.23)	AT (1.16)	AT (1.13)		C (0.55)	AC (2.72)	CCG (2.38)	AAAC (0.52)	AAAAC (0.41)	AAAGCC (0.02)

## Sheet: Intron
Table S5D. The most abundant P-SSR repeat motif in intron regions of Euarchontoglires genomes.
Order	Suborder	Family	Species	The top five most abundant P-SSR motifs (loci/Mb)						The most abundant motif for mono- to hexanucleotide P-SSR
				First	Second	Third	Fourth	Fifth		Mono-	Di-	Tri-	Tetra-	Penta-	Hexa-
Primates	Haplorrhini	Aotidae	Aotus nancymaae	AC (44.37)	AAAT (16.1)	AG (15.91)	AT (14.18)	AT (8.7)		C (0.95)	AC (44.37)	AAT (7.26)	AAAT (16.1)	AAAAC (4.37)	AAAAAC (0.87)
Primates	Haplorrhini	Atelidae	Saimiri boliviensis	AC (49.51)	AG (18.54)	AAAT (16.79)	AT (14.37)	AT (12.07)		C (1.12)	AC (49.51)	AAC (7.48)	AAAT (16.79)	AAAAC (7.0)	AAAAAC (1.58)
Primates	Haplorrhini	Atelidae	Sapajus apella	AC (51.5)	AT (19.53)	AG (17.85)	AAAT (17.51)	AAAT (9.46)		C (3.12)	AC (51.5)	AAT (7.01)	AAAT (17.51)	AAAAC (4.72)	AAAAAC (0.67)
Primates	Haplorrhini	Cebidae	Cercocebus atys	AC (51.47)	AAAT (21.83)	AG (17.57)	AAAC (15.31)	AAAC (14.92)		C (1.57)	AC (51.47)	AAT (10.21)	AAAT (21.83)	AAAAC (8.3)	AAAAAC (1.47)
Primates	Haplorrhini	Cebidae	Chlorocebus sabaeus	AC (46.66)	AAAT (22.76)	AG (17.24)	AAAC (15.43)	AAAC (13.36)		C (1.94)	AC (46.66)	AAT (10.66)	AAAT (22.76)	AAAAC (8.71)	AAAAAC (1.6)
Primates	Haplorrhini	Cebidae	Colobus angolensis	AC (39.26)	AAAT (19.35)	AG (13.46)	AAAC (12.51)	AAAC (11.93)		C (0.81)	AC (39.26)	AAT (8.82)	AAAT (19.35)	AAAAC (6.41)	AAAAAC (0.89)
Primates	Haplorrhini	Cebidae	Macaca mulatta	AC (49.23)	AAAT (23.47)	AG (17.15)	AAAC (15.74)	AAAC (15.46)		C (2.24)	AC (49.23)	AAT (10.82)	AAAT (23.47)	AAAAC (8.47)	AAAAAC (1.43)
Primates	Haplorrhini	Cebidae	Macaca nemestrina	AC (50.08)	AAAT (22.27)	AG (17.95)	AAAC (16.34)	AAAC (13.17)		C (1.79)	AC (50.08)	AAT (10.43)	AAAT (22.27)	AAAAC (8.78)	AAAAAC (1.59)
Primates	Haplorrhini	Cebidae	Mandrillus leucophaeus	AC (40.29)	AAAT (18.96)	AG (13.83)	AAAC (13.47)	AAAC (9.89)		C (0.73)	AC (40.29)	AAT (8.67)	AAAT (18.96)	AAAAC (7.26)	AAAAAC (1.31)
Primates	Haplorrhini	Cercopithecidae	Papio anubis	AC (47.32)	AAAT (23.9)	AG (17.27)	AAAC (16.31)	AAAC (14.92)		C (3.25)	AC (47.32)	AAT (11.12)	AAAT (23.9)	AAAAC (8.79)	AAAAAC (1.36)
Primates	Haplorrhini	Cercopithecidae	Piliocolobus tephrosceles	AC (42.56)	AAAT (22.82)	AT (17.49)	AAAC (14.3)	AAAC (13.94)		C (4.99)	AC (42.56)	AAT (10.36)	AAAT (22.82)	AAAAC (7.22)	AAAAAC (1.09)
Primates	Haplorrhini	Cercopithecidae	Rhinopithecus bieti	AC (42.83)	AAAT (22.62)	AG (15.94)	AAAC (14.53)	AAAC (13.39)		C (2.71)	AC (42.83)	AAT (10.06)	AAAT (22.62)	AAAAC (9.38)	AAGGAG (0.16)
Primates	Haplorrhini	Cercopithecidae	Rhinopithecus roxellana	AC (43.9)	AAAT (23.37)	AG (16.13)	AT (15.49)	AT (14.45)		C (3.41)	AC (43.9)	AAT (10.48)	AAAT (23.37)	AAAAC (7.6)	AAAAAC (1.23)
Primates	Haplorrhini	Cercopithecidae	Theropithecus gelada	AC (43.36)	AAAT (22.1)	AG (15.62)	AAAC (15.11)	AAAC (13.68)		C (2.71)	AC (43.36)	AAT (10.2)	AAAT (22.1)	AAAAC (8.19)	AAAAAC (1.41)
Primates	Haplorrhini	Cercopithecidae	Trachypithecus francoisi	AC (45.66)	AAAT (23.86)	AG (16.75)	AT (15.47)	AT (14.64)		C (2.06)	AC (45.66)	AAT (10.49)	AAAT (23.86)	AAAAC (7.58)	AAAAAC (1.17)
Primates	Haplorrhini	Cercopithecidae	Gorilla gorilla	AC (44.45)	AAAT (22.65)	AG (16.01)	AAAC (15.49)	AAAC (14.02)		C (2.78)	AC (44.45)	AAT (10.45)	AAAT (22.65)	AAAAC (8.4)	AAAAAC (1.44)
Primates	Haplorrhini	Cercopithecidae	Homo sapiens	AC (51.39)	AAAT (25.16)	AT (22.63)	AG (17.96)	AG (15.87)		C (1.59)	AC (51.39)	AAT (11.61)	AAAT (25.16)	AAAAC (7.98)	AAAAAC (1.36)
Primates	Haplorrhini	Cercopithecidae	Pan paniscus	AC (46.41)	AAAT (22.78)	AT (18.92)	AG (15.22)	AG (15.02)		C (1.53)	AC (46.41)	AAT (10.26)	AAAT (22.78)	AAAAC (7.54)	AAAAAC (1.24)
Primates	Haplorrhini	Cercopithecidae	Pan troglodytes	AC (46.44)	AAAT (23.02)	AT (18.82)	AG (15.2)	AG (15.18)		C (2.04)	AC (46.44)	AAT (10.38)	AAAT (23.02)	AAAAC (7.55)	AAAAAC (1.26)
Primates	Haplorrhini	Cercopithecidae	Pongo abelii	AC (43.79)	AAAT (22.22)	AT (17.21)	AG (13.6)	AG (12.92)		C (1.71)	AC (43.79)	AAT (12.59)	AAAT (22.22)	AAAAC (6.72)	AAAAAC (1.01)
Primates	Haplorrhini	Cercopithecidae	Nomascus leucogenys	AC (43.2)	AAAT (21.05)	AT (18.51)	AG (13.94)	AG (12.37)		C (2.18)	AC (43.2)	AAT (9.79)	AAAT (21.05)	AAAAC (6.51)	AAAAAC (0.85)
Primates	Haplorrhini	Cercopithecidae	Hylobates moloch	AC (42.25)	AAAT (21.0)	AT (16.8)	AG (13.4)	AG (12.46)		C (2.8)	AC (42.25)	AAT (9.75)	AAAT (21.0)	AAAAC (6.64)	AAAAAC (0.93)
Primates	Haplorrhini	Cercopithecidae	Carlito syrichta	AC (45.26)	AAAT (22.25)	AG (20.47)	AT (11.83)	AT (10.63)		C (4.05)	AC (45.26)	AAT (9.06)	AAAT (22.25)	AAAAC (4.99)	AAAAAC (0.61)
Primates	Strepsirrhini	Cercopithecidae	Microcebus murinus	AC (36.51)	AT (20.77)	AG (15.13)	AAAT (13.61)	AAAT (6.62)		C (4.74)	AC (36.51)	AAT (5.3)	AAAT (13.61)	AAAAC (3.04)	AAAAAC (0.26)
Primates	Strepsirrhini	Cercopithecidae	Otolemur garnettii	AC (21.12)	AAAT (19.89)	AAC (11.67)	AG (9.99)	AG (9.73)		C (4.31)	AC (21.12)	AAC (11.67)	AAAT (19.89)	AAAAC (2.74)	AAAAAC (0.4)
Primates	Strepsirrhini	Cercopithecidae	Propithecus coquereli	AC (27.53)	AG (9.72)	AAAT (5.93)	AT (5.3)	AT (3.22)		C (1.33)	AC (27.53)	AAT (2.83)	AAAT (5.93)	AAAAC (1.65)	AAAAAC (0.16)
Rodentia	Castorimorpha	Cercopithecidae	Castor canadensis	AC (49.52)	AG (25.1)	AT (13.28)	AAAT (11.55)	AAAT (7.11)		C (4.04)	AC (49.52)	AAT (4.7)	AAAT (11.55)	AAAAC (3.15)	AAAAAC (0.22)
Rodentia	Castorimorpha	Cercopithecidae	Dipodomys ordii	AC (134.03)	AG (32.31)	AT (28.62)	AAGG (25.05)	AAGG (15.34)		C (14.6)	AC (134.03)	AAC (15.27)	AAGG (25.05)	AAAAC (3.14)	ACAGAG (0.37)
Rodentia	Hystricomorpha	Cercopithecidae	Fukomys damarensis	AC (59.87)	AG (21.83)	AAAC (17.82)	AAAT (14.04)	AAAT (13.89)		C (1.55)	AC (59.87)	AAC (8.57)	AAAC (17.82)	AAAAC (9.23)	AAAAAC (1.06)
Rodentia	Hystricomorpha	Hominidae	Heterocephalus glaber	AC (43.41)	AG (17.51)	AAAT (13.26)	AT (12.93)	AT (8.34)		C (6.83)	AC (43.41)	AAC (5.25)	AAAT (13.26)	AAAAC (5.28)	AAAAAC (0.52)
Rodentia	Hystricomorpha	Hominidae	Cavia porcellus	AC (44.52)	AG (21.33)	AT (17.69)	AAAT (10.34)	AAAT (9.95)		C (7.1)	AC (44.52)	AAC (4.43)	AAAT (10.34)	AAAAC (6.29)	ACAGAG (0.92)
Rodentia	Hystricomorpha	Hominidae	Chinchilla lanigera	AC (44.98)	AG (16.2)	AAAT (14.25)	AT (12.79)	AT (11.34)		C (2.51)	AC (44.98)	AAT (4.43)	AAAT (14.25)	AAAAC (7.86)	AAAAAC (1.11)
Rodentia	Hystricomorpha	Hominidae	Octodon degus	AC (75.79)	AAAT (40.28)	AG (28.29)	AAAG (15.89)	AAAG (14.1)		C (6.24)	AC (75.79)	AAT (7.69)	AAAT (40.28)	AAAAC (5.03)	ACAGAG (1.56)
Rodentia	Myomorpha	Hominidae	Cricetulus griseus	AC (177.37)	AG (61.15)	AAAC (22.98)	AAAT (16.76)	AAAT (16.15)		C (15.13)	AC (177.37)	AAC (10.32)	AAAC (22.98)	AAAAC (10.4)	ACAGAG (1.62)
Rodentia	Myomorpha	Cheirogaleidae	Mesocricetus auratus	AC (128.36)	AG (38.55)	AAAC (14.66)	C (11.1)	C (10.74)		C (11.1)	AC (128.36)	AAC (6.44)	AAAC (14.66)	AAAAC (4.41)	ACAGAG (1.64)
Rodentia	Myomorpha	Hylobatidae	Microtus ochrogaster	AC (112.41)	AG (40.72)	AAAT (21.17)	AAAC (14.34)	AAAC (12.67)		C (11.96)	AC (112.41)	AAC (7.37)	AAAT (21.17)	AAAAC (4.41)	ACAGAG (0.58)
Rodentia	Myomorpha	Cebidae	Neotoma lepida	AC (103.8)	AG (25.57)	AAAC (15.78)	AAAT (11.45)	AAAT (10.96)		C (1.0)	AC (103.8)	AAC (6.72)	AAAC (15.78)	AAAAC (5.73)	ACAGAG (0.82)
Rodentia	Myomorpha	Hylobatidae	Peromyscus leucopus	AC (174.02)	AG (52.11)	AAAC (23.32)	AT (19.91)	AT (17.49)		C (17.49)	AC (174.02)	AAC (10.19)	AAAC (23.32)	AAAAC (6.94)	AAAAAC (1.04)
Rodentia	Myomorpha	Pitheciidae	Peromyscus maniculatus	AC (161.17)	AG (46.28)	AAAC (23.54)	AT (17.58)	AT (17.0)		C (17.0)	AC (161.17)	AAC (10.55)	AAAC (23.54)	AAAAC (7.38)	AAAAAC (1.19)
Rodentia	Myomorpha	Pitheciidae	Jaculus jaculus	AG (120.77)	AC (76.25)	AAAT (58.71)	AAAC (16.36)	AAAC (15.52)		C (6.47)	AG (120.77)	AAC (8.94)	AAAT (58.71)	AAAAC (6.1)	AAAAAC (0.86)
Rodentia	Myomorpha	Tarsiidae	Arvicanthis niloticus	AC (160.92)	AG (65.65)	AAAC (28.21)	AT (25.59)	AT (22.77)		C (22.77)	AC (160.92)	AAC (10.92)	AAAC (28.21)	AAAAC (8.55)	ACAGAG (1.6)
Rodentia	Myomorpha	Cheirogaleidae	Grammomys surdaster	AC (154.42)	AG (64.67)	AAAC (25.91)	AT (19.37)	AT (17.86)		C (11.03)	AC (154.42)	AGG (10.95)	AAAC (25.91)	AAAAC (7.0)	AGAGGG (2.0)
Rodentia	Myomorpha	Cheirogaleidae	Mastomys coucha	AC (159.27)	AG (62.01)	AAAC (30.63)	AT (23.67)	AT (20.64)		C (8.39)	AC (159.27)	AAC (12.61)	AAAC (30.63)	AAAAC (14.03)	AAAAAC (2.44)
Rodentia	Myomorpha	Cheirogaleidae	Meriones unguiculatus	AC (111.99)	AG (33.99)	AAAC (29.66)	AT (15.35)	AT (14.19)		C (10.32)	AC (111.99)	AAC (9.97)	AAAC (29.66)	AAAAC (10.72)	AAAAAC (1.01)
Rodentia	Myomorpha	Cheirogaleidae	Mus caroli	AC (159.39)	AG (62.56)	AAAC (31.78)	AT (27.08)	AT (19.5)		C (15.33)	AC (159.39)	AAC (12.95)	AAAC (31.78)	AAAAC (12.5)	ACAGAG (1.67)
Rodentia	Myomorpha	Cheirogaleidae	Mus musculus	AC (185.69)	AG (74.77)	AAAC (36.49)	AT (27.01)	AT (23.67)		C (23.67)	AC (185.69)	AAC (15.22)	AAAC (36.49)	AAAAC (15.2)	AAAAAC (2.08)
Rodentia	Myomorpha	Cheirogaleidae	Mus pahari	AC (172.75)	AG (64.03)	AAAC (30.02)	AT (29.27)	AT (21.24)		C (19.39)	AC (172.75)	AAC (14.88)	AAAC (30.02)	AAAAC (13.15)	ACAGAG (2.22)
Rodentia	Myomorpha	Cheirogaleidae	Rattus norvegicus	AC (189.31)	AG (66.39)	AT (20.6)	AAAC (18.2)	AAAC (12.4)		C (11.53)	AC (189.31)	AAC (10.28)	AAAC (18.2)	AAAAC (7.07)	ACAGAG (2.13)
Rodentia	Myomorpha	Daubentoniidae	Rattus rattus	AC (219.27)	AG (67.65)	AT (18.81)	AAAC (18.79)	AAAC (14.38)		C (4.87)	AC (219.27)	AGG (14.38)	AAAC (18.79)	AAAAC (6.83)	ACAGAG (2.24)
Rodentia	Myomorpha	Cheirogaleidae	Nannospalax galili	AC (110.9)	AG (39.38)	AAAT (19.95)	AT (12.25)	AT (11.2)		C (6.86)	AC (110.9)	AAT (7.03)	AAAT (19.95)	AAAAC (5.42)	AAAAAC (0.53)
Rodentia	Sciuromorpha	Galagidae	Ictidomys tridecemlineatus	AC (64.97)	AG (39.31)	AAAT (25.53)	AT (21.12)	AT (9.77)		C (3.34)	AC (64.97)	AAC (8.79)	AAAT (25.53)	AAAAC (3.76)	AAAAAC (0.37)
Rodentia	Sciuromorpha	Indriidae	Marmota flaviventris	AC (65.11)	AG (34.11)	AAAT (25.46)	AT (25.32)	AT (17.23)		C (17.23)	AC (65.11)	AAT (8.55)	AAAT (25.46)	AGGGG (3.19)	AGCCCC (0.27)
Rodentia	Sciuromorpha	Indriidae	Urocitellus parryii	AC (64.56)	AG (42.35)	AAAT (25.8)	AT (24.04)	AT (9.37)		C (8.14)	AC (64.56)	AAC (8.35)	AAAT (25.8)	AAAAC (3.65)	AAAAAC (0.38)
Lagomorpha	—	Leporidae	Oryctolagus cuniculus	AG (169.21)	AAAT (73.22)	AC (51.4)	C (16.49)	C (14.75)		C (16.49)	AG (169.21)	AAC (4.39)	AAAT (73.22)	AAAAC (3.92)	AGAGGG (1.44)
Lagomorpha	—	Ochotonidae	Ochotona princeps	AC (37.16)	AG (30.44)	AAAT (10.45)	AT (7.93)	AT (4.71)		C (2.43)	AC (37.16)	AAT (4.71)	AAAT (10.45)	AAAAC (2.25)	AAAAAC (0.19)
Scandentia	—	Tupaiidae	Tupaia chinensis	AG (113.97)	AC (88.99)	AAAT (42.28)	AAT (20.28)	AAT (19.33)		C (10.08)	AG (113.97)	AAT (20.28)	AAAT (42.28)	AAAAC (9.2)	AAAAAC (1.45)
Dermoptera	—	Cynocephalidae	Galeopterus variegatus	AC (37.72)	AAAT (19.32)	AG (14.88)	AT (13.27)	AT (11.2)		C (11.2)	AC (37.72)	AAT (6.93)	AAAT (19.32)	AAAAT (2.88)	AAAAAT (0.31)
